# Supplementary material for: Haploinsufficiency networks identify targetable patterns of allelic deficiency in low mutation ovarian cancer
Source: PubMed Central journal article supplement (PMC5316854; doi:10.1038/ncomms14423), 2017-02-15
Supplement: ncomms14423-s1.pdf [file ncomms14423-s1.pdf]

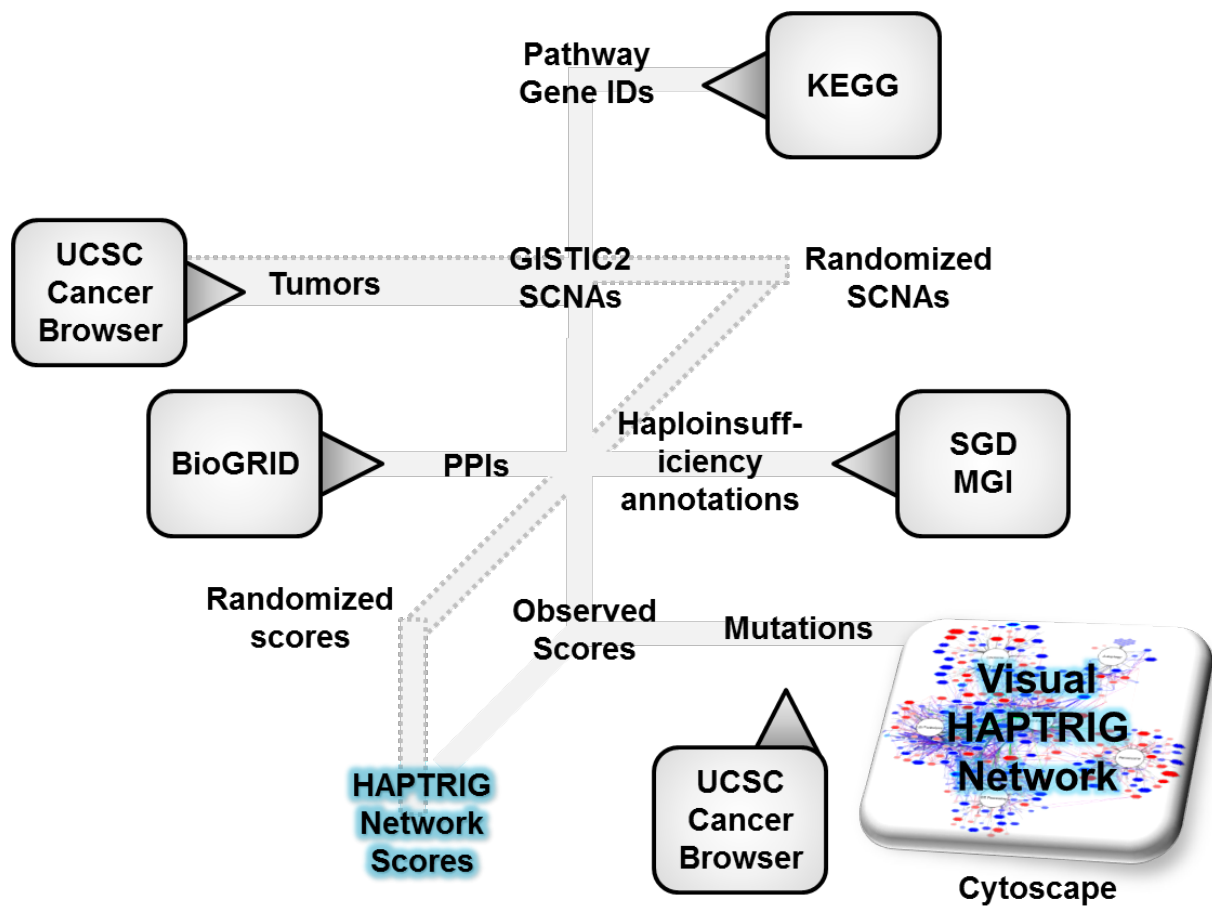

**Supplementary Figure 1. HAPTRIG network scoring workflow.** Data and annotation sources are indicated by filled boxes. Outputs from sources are indicated by overlaid text. Calculations can be found in Methods or Supplemental Software 1.

**a**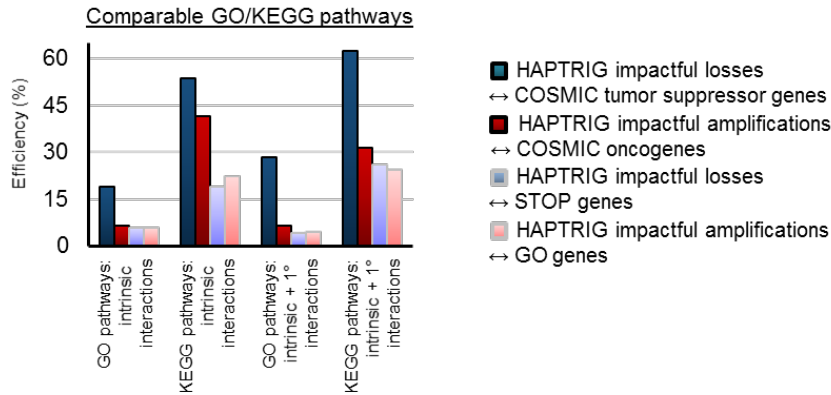**b**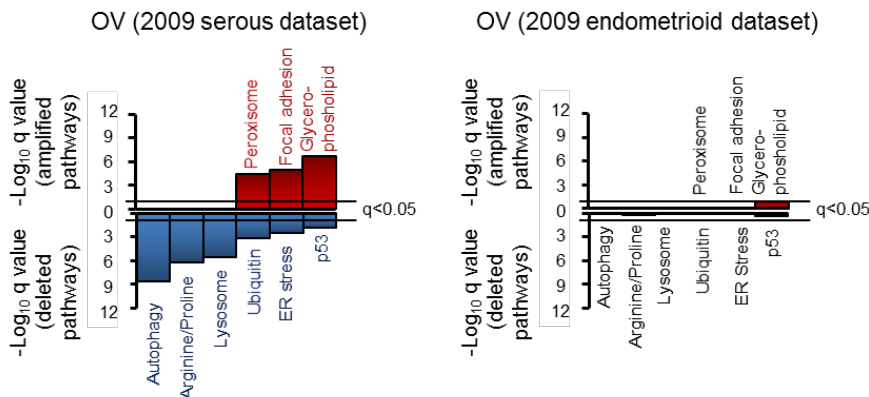**c**

Steps:

- 1) Select cancer type
- 2) Select KEGG pathway
- 3) Run HAPTRIG

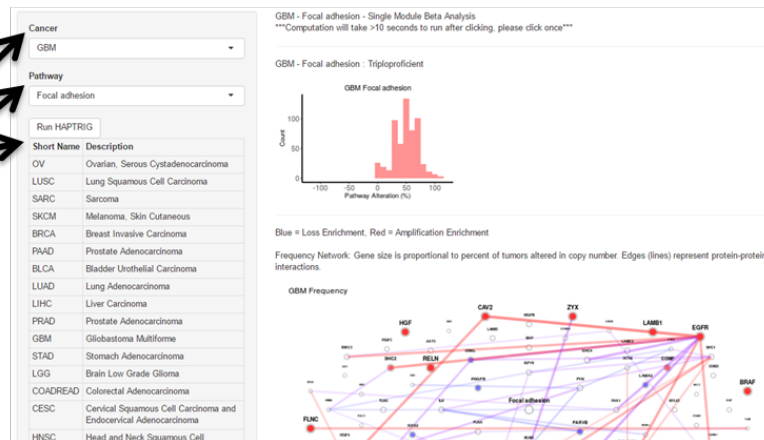

**Supplementary Figure 2. Additional HAPTRIG controls and datasets.** (a) Comparable GO/KEGG pathways (see Supplementary Data 4. Includes proteostasis pathways and 11 other tumor-related pathways) were scored by HAPTRIG, either using only protein-protein interactions within a pathway (intrinsic) or with protein-protein interactions which could include a gene outside the pathway (1° interactions). Unlike the 187-pathway analysis, 1° interactions better prioritized KEGG tumor suppressor genes and thus were used in the proteostasis network scores for Fig. 3. (b) Additional, independent OV datasets were used to verify HAPTRIG findings. As expected, proteostasis pathways were downregulated in the serous dataset, but not the endometrioid dataset. Using all 187 pathways, autophagy was the #2 suppressed pathway in the serous dataset (Supplementary Data 2), but did not reach significance in the endometrioid dataset (Supplementary Data 3). (c) Screenshot from the free, available web tool to perform systematic HAPTRIG analysis on 21 cancer types and 187 KEGG pathways.

The tool is available at:

[https://delaney.shinyapps.io/HAPTRIG\\_Single\\_Module\\_Beta/](https://delaney.shinyapps.io/HAPTRIG_Single_Module_Beta/)

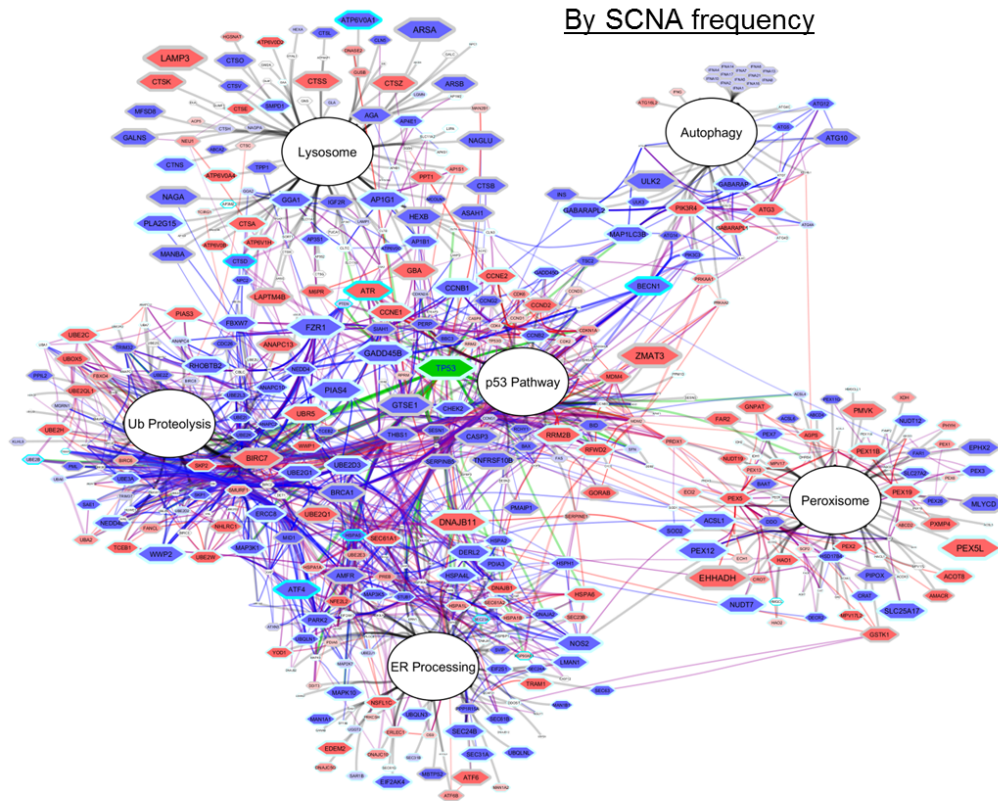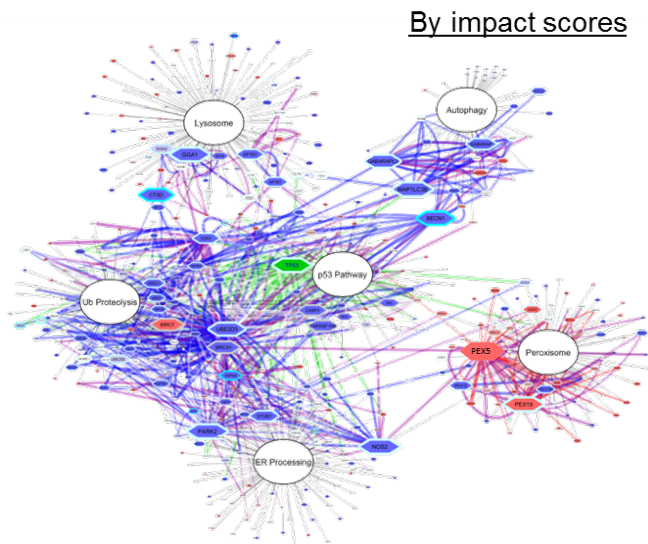

**Supplementary Figure 3. Visual HAPTRIG networks for OV.** Gene nodes and edge protein-protein interactions are displayed with size proportionate to the prevalence of the gene change within the cancer type (top panel) or by the level of the gene's impact on pathways as scored by HAPTRIG (bottom panel). Edges are only drawn if one gene is affected by copy number changes in >33% of patient tumors (top panel) or if the impact of one gene in the edge is 1 z-score away from the mean impact (bottom panel). A red color is assigned if the majority of copy number changes are positive, and blue if they are negative. Green fill and edges indicate genes mutated in >10% of the tumor cohort. Node outlines are highlighted in cyan if haploinsufficiency annotations are associated with that gene: bright cyan if murine evidence exists and light cyan if yeast homologue evidence was found. Grey edges connect genes to corresponding KEGG pathways. *IFNA* genes are visually clustered due to their locally arrayed position on chromosome 9p21.3.

**a****GSEA Plots**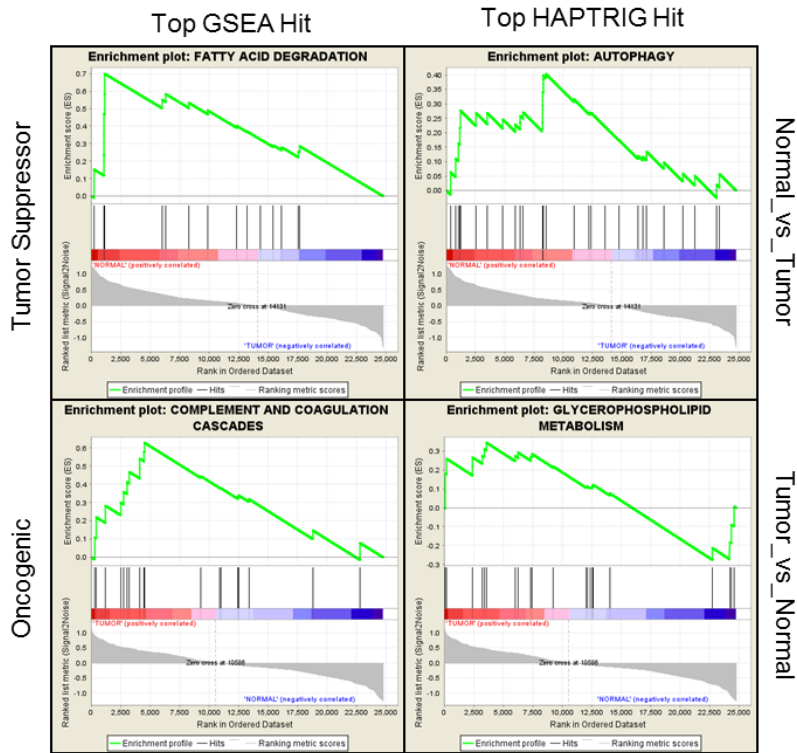**b**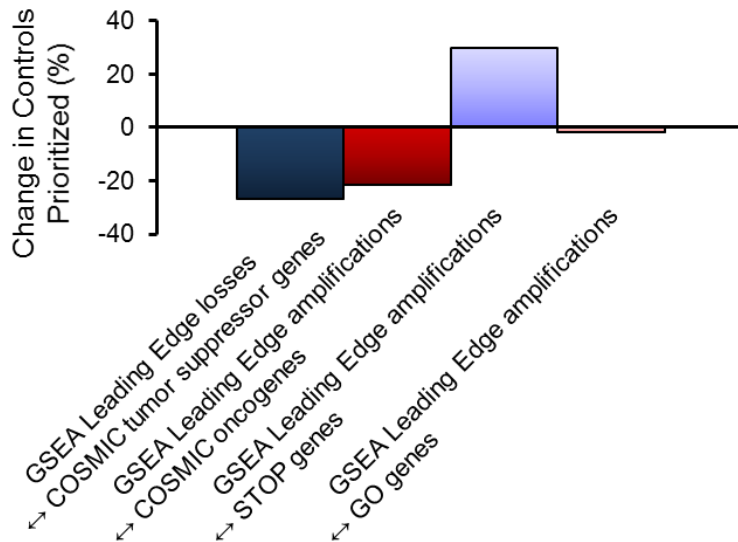

**Supplementary Figure 4. Comparison of HAPTRIG to GSEA.** (a) Copy-number data for OV was input into GSEA using identical pathways as HAPTRIG. Results of GSEA for top-hit tumor suppressors and oncogenic pathways are shown for both GSEA and HAPTRIG. All pathways and direct comparisons are enumerated in Supplemental Data 8. (b) Benchmarking of GSEA in comparison to HAPTRIG was performed as in Figure 1. HAPTRIG identified more tumor suppressor genes and oncogenes as most impactful compared to leading edge analysis of GSEA, but the opposite was observed for prioritization of STOP genes, suggesting the methods are complementary.

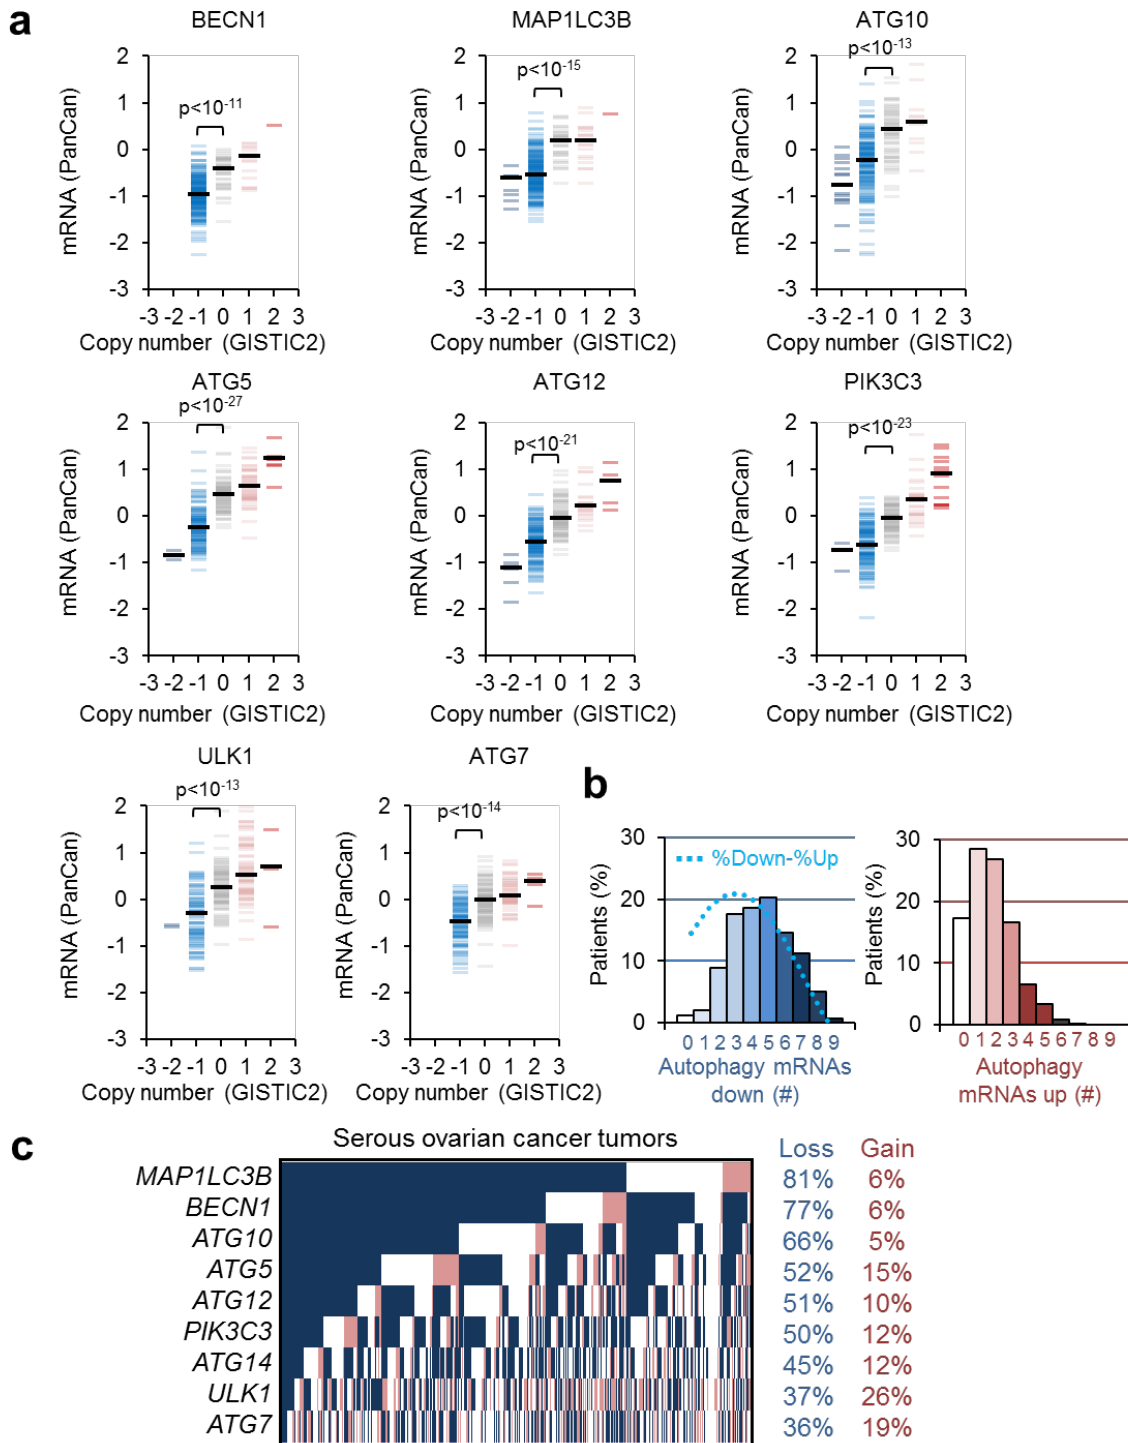

**Supplementary Figure 5. Monoallelic losses of autophagy genes match mRNA suppression.** (a) GISTIC2 calls of core autophagy genes are compared to microarray RNA expression levels within OV. Microarray mRNA comparisons are displayed since there are a higher number of samples than RNAseq. (b) Per patient data on number of autophagy mRNA displaying downregulation versus upregulation. Z score and EXP score cutoffs were set at  $\pm 0.5$ . Autophagy gene queries match the canonical core initiation genes shown in (a). (c) TCGA OV tumors are compared for coincident losses of autophagy genes: each column represents a single tumor. Blue corresponds to allelic deletion, red to allelic gain.

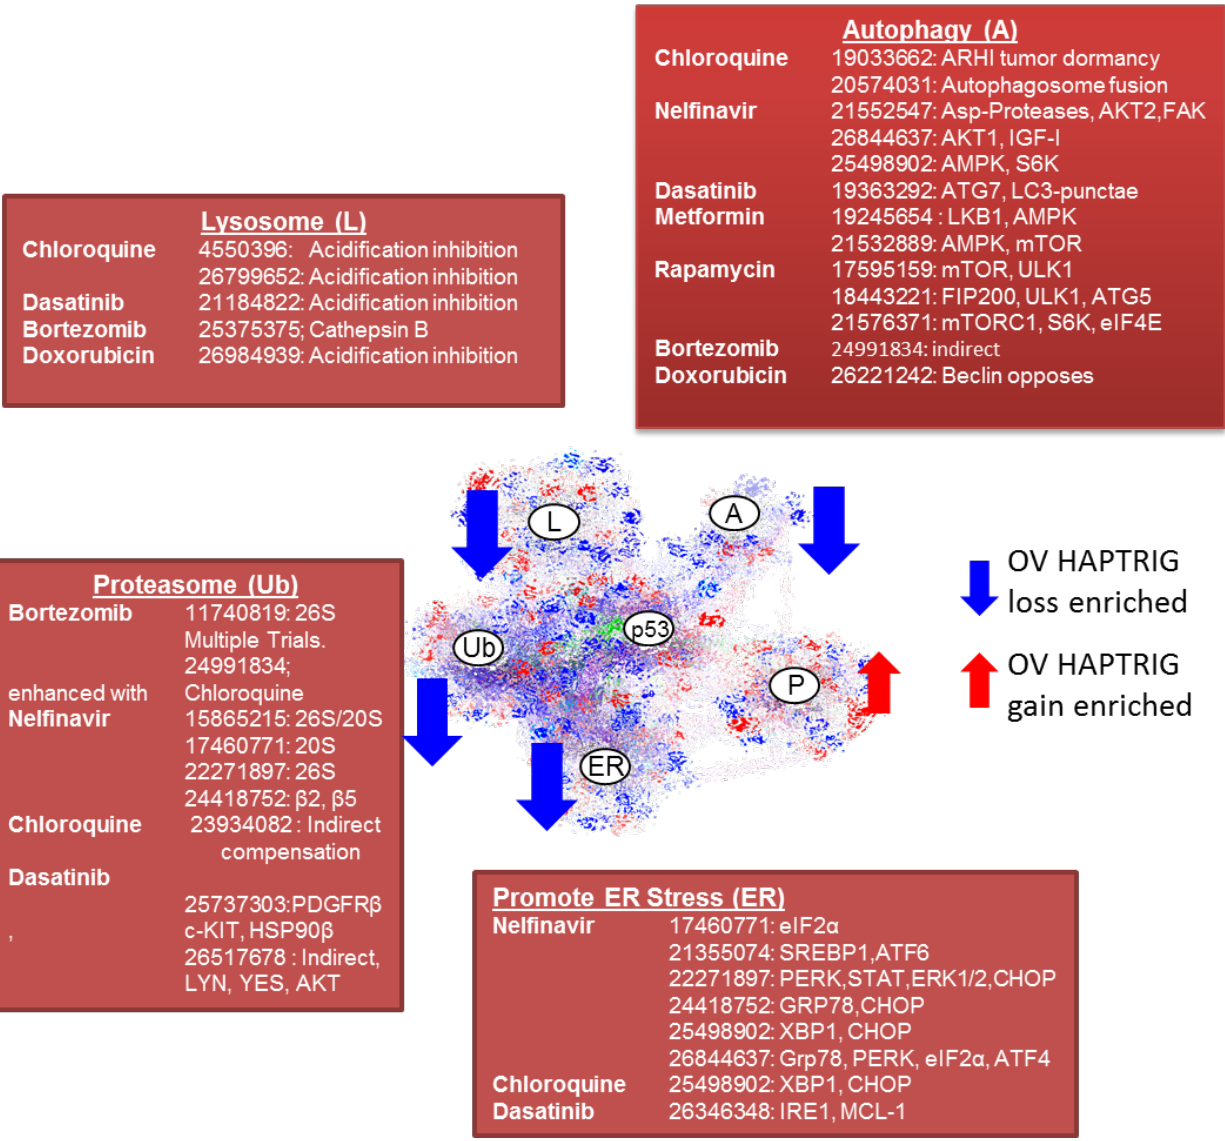

**Supplementary Figure 6. Approved drugs targeting the monoallelically disrupted proteostasis pathways of OV.** Summary of altered proteostasis pathways in OV and FDA-approved drugs impacting the pathway, with corresponding publication report (PMID number shown).

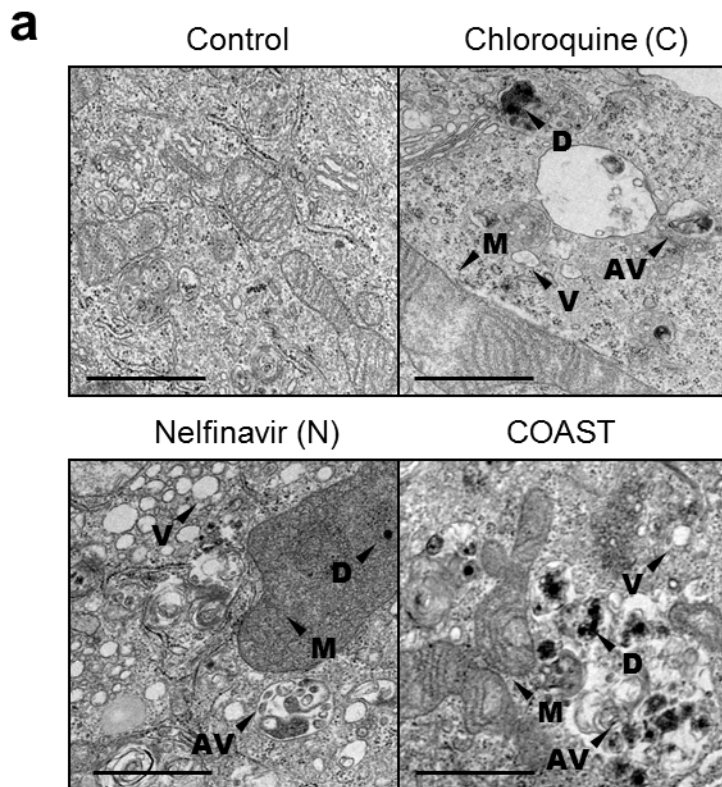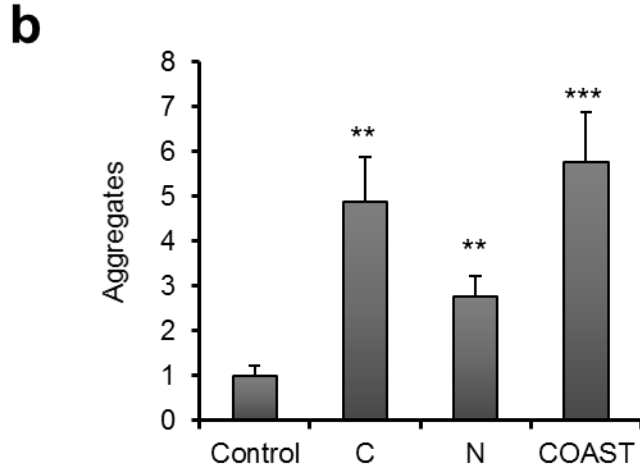

**Supplementary Figure 7. Quantitation of protein aggregation by electron microscopy.** (a) Transmission electron micrographs of OVCAR3 cells treated for 12 hours with COAST components or the full combination (metformin 10 $\mu$ M, chloroquine 10 $\mu$ M, nelfinavir 10 $\mu$ M, rapamycin 10nM, and/or dasatinib, 50nM). Labels: M, Mitochondria, V, Vesicle, AV, Autophagic Vesicle, D, Dense protein aggregate. Scale bar is 1 $\mu$ m. (b) Images were blinded and then quantified for electron dense protein aggregates. Data represent mean  $\pm$  s.e.m. from a single experiment. Aggregate quantitation is relative to control cells. \*\* $p < 0.01$ , \*\*\* $p < 0.001$  by two-tailed student's t-test.

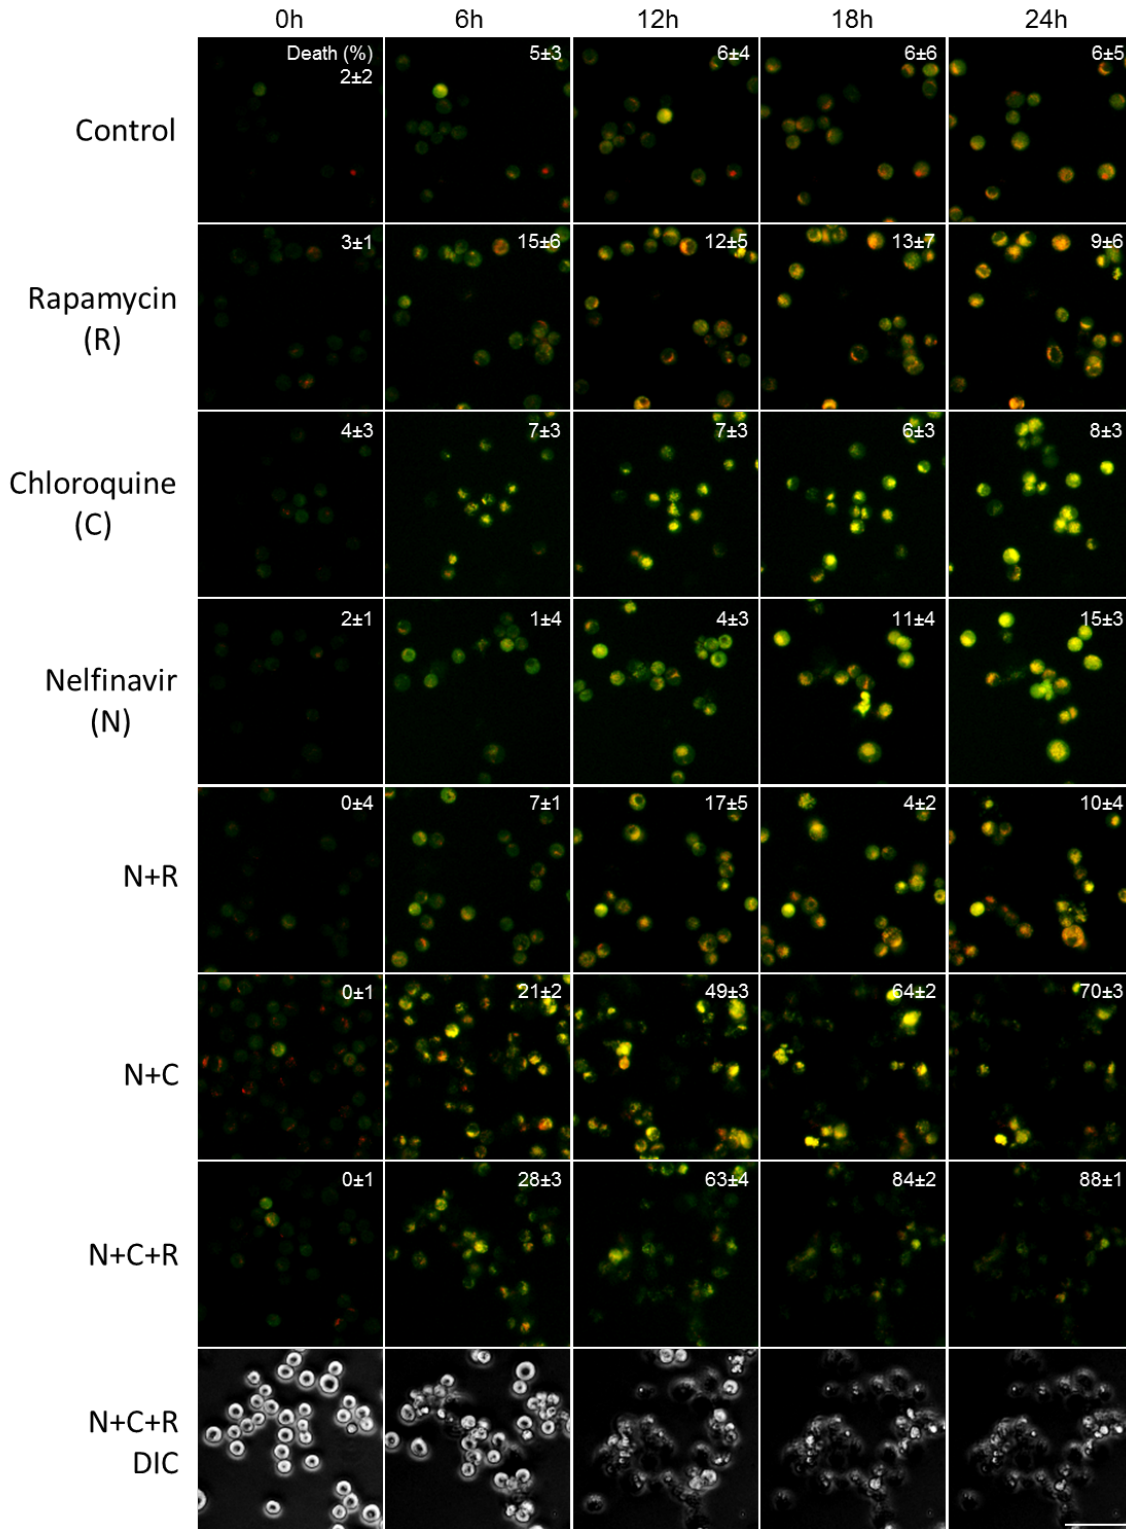



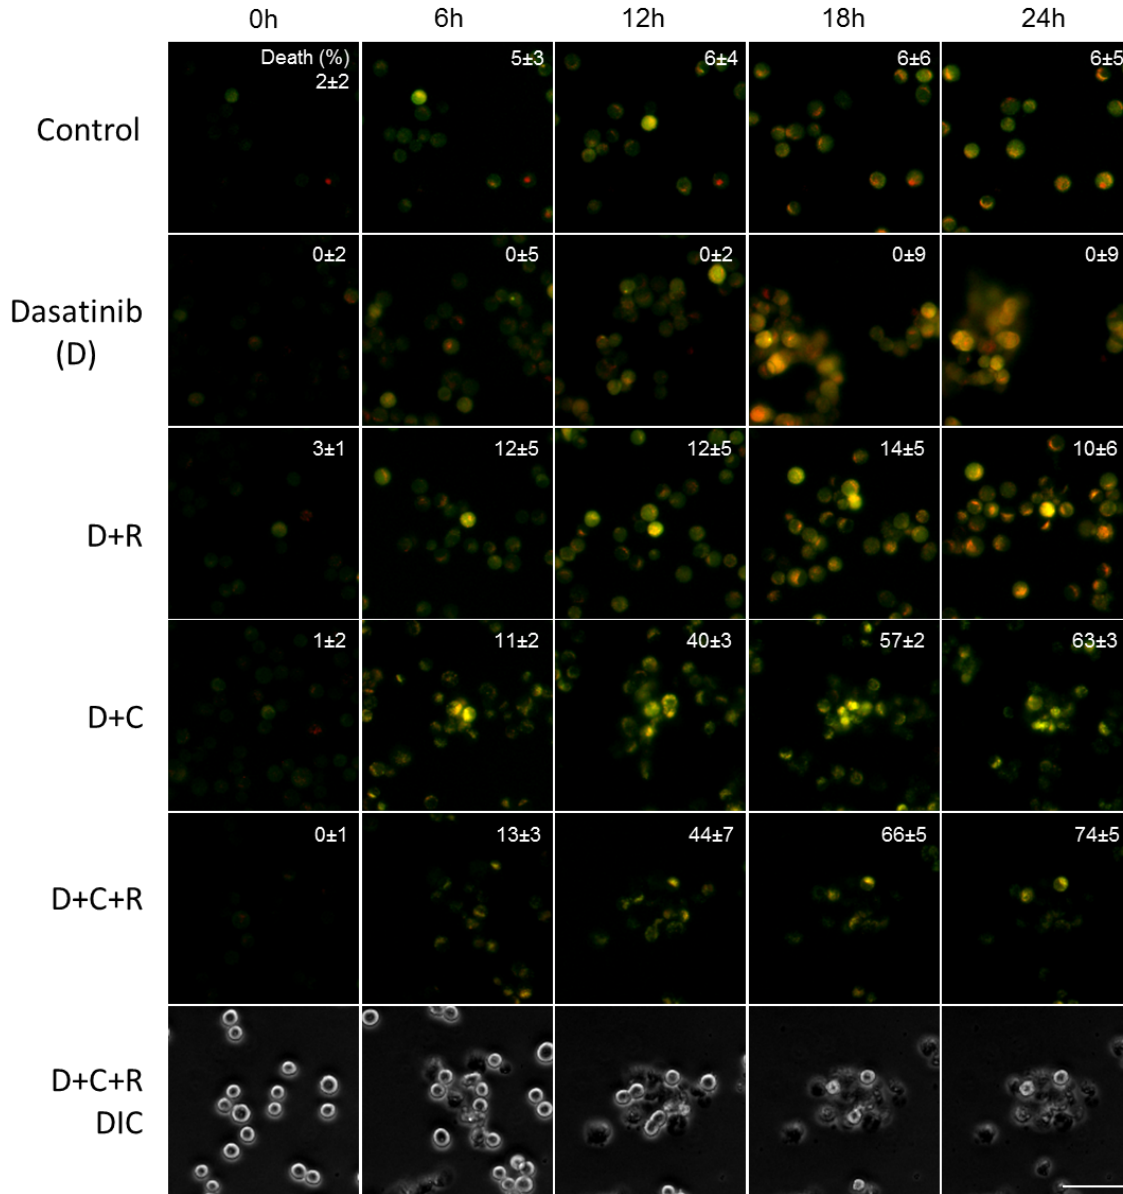

**Supplementary Figure 8. Live autophagic flux microscopy of COAST on OVCAR3 cells.** OVCAR3 cells with a virally integrated mCherry-GFP-LC3 construct were studied for autophagic flux by live microscopy. Autophagolysosome formation quenches the GFP signal due to acidification, which mCherry is resistant to and remains fluorescing red. Yellow punctae thus primarily represent autophagosome structures which have not passed the lysosome fusion stage. Cells were treated with drugs (COAST component drugs which included chloroquine (C, 10 $\mu$ M), nelfinavir (N, 10 $\mu$ M), rapamycin (R, 100nM), and/or dasatinib (D, 100nM)) and then imaged live in normal cell culture conditions by spinning disc microscopy. Lysed cell percentages are shown by inset text. Three independent experiments were performed with representative images shown, numbers represent mean  $\pm$  s.e.m. Scale bar is 40 $\mu$ m.

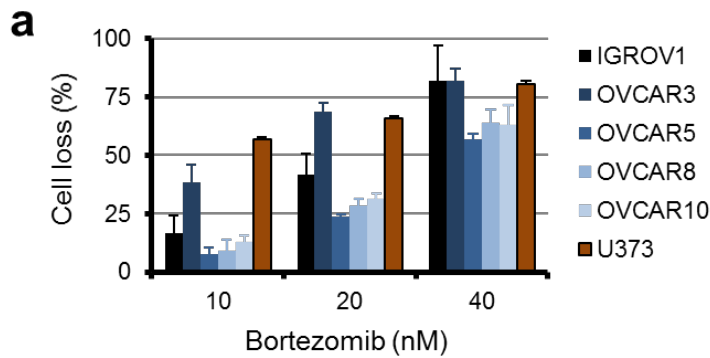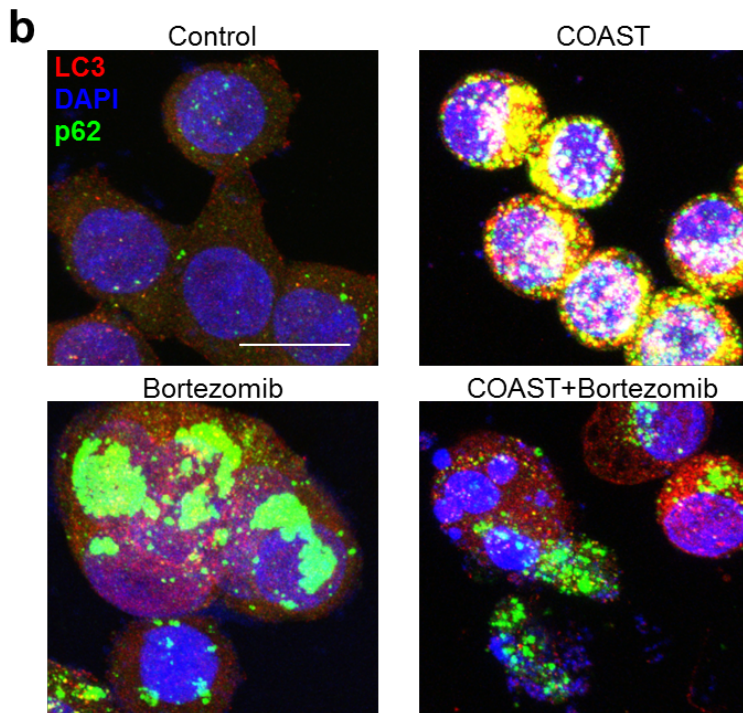

**c**

Most frequent adverse event

| Drug              | G1-2        | G3         | G4         | Safety reference        |
|-------------------|-------------|------------|------------|-------------------------|
| Chloroquine       | 2%          | -          | -          | PMID 10759574           |
| Nelfinavir        | 17%         | -          | -          | FDA (NDA 21-503)        |
| Rapamycin         | 35%         | 15%        | 2%         | PMID 21752435           |
| Dasatinib         | 17%         | 5%         |            | FDA (NDA 21-986)        |
| Metformin         | 8-13%       | -          | -          | PMID 17638715           |
| <b>Bortezomib</b> | <b>100%</b> | <b>61%</b> | <b>14%</b> | <b>FDA (NDA 21-602)</b> |

**Supplementary Figure 9. Bortezomib is cytotoxic and induces aggregates, but at the cost of clinical safety.** (a) Crystal violet viability assay of cells treated with indicated concentrations of bortezomib for 48 hours. (b) Immunofluorescence of OVCAR3 cells treated with bortezomib (40nM) and/or COAST (the combination of metformin, chloroquine, nelfinavir, rapamycin, and dasatinib at 10 $\mu$ M, 10 $\mu$ M, 10 $\mu$ M, 10nM, and 50nM, respectively) for 24 hours. Scale bar is 20 $\mu$ m. (c) Safety data from clinical trials suggest non-overlapping toxicity and low toxicity for all COAST drugs used here, with the exception of bortezomib. Due to the high expectation of toxicity with bortezomib, especially in combination, we did not include the drug in further analyses.

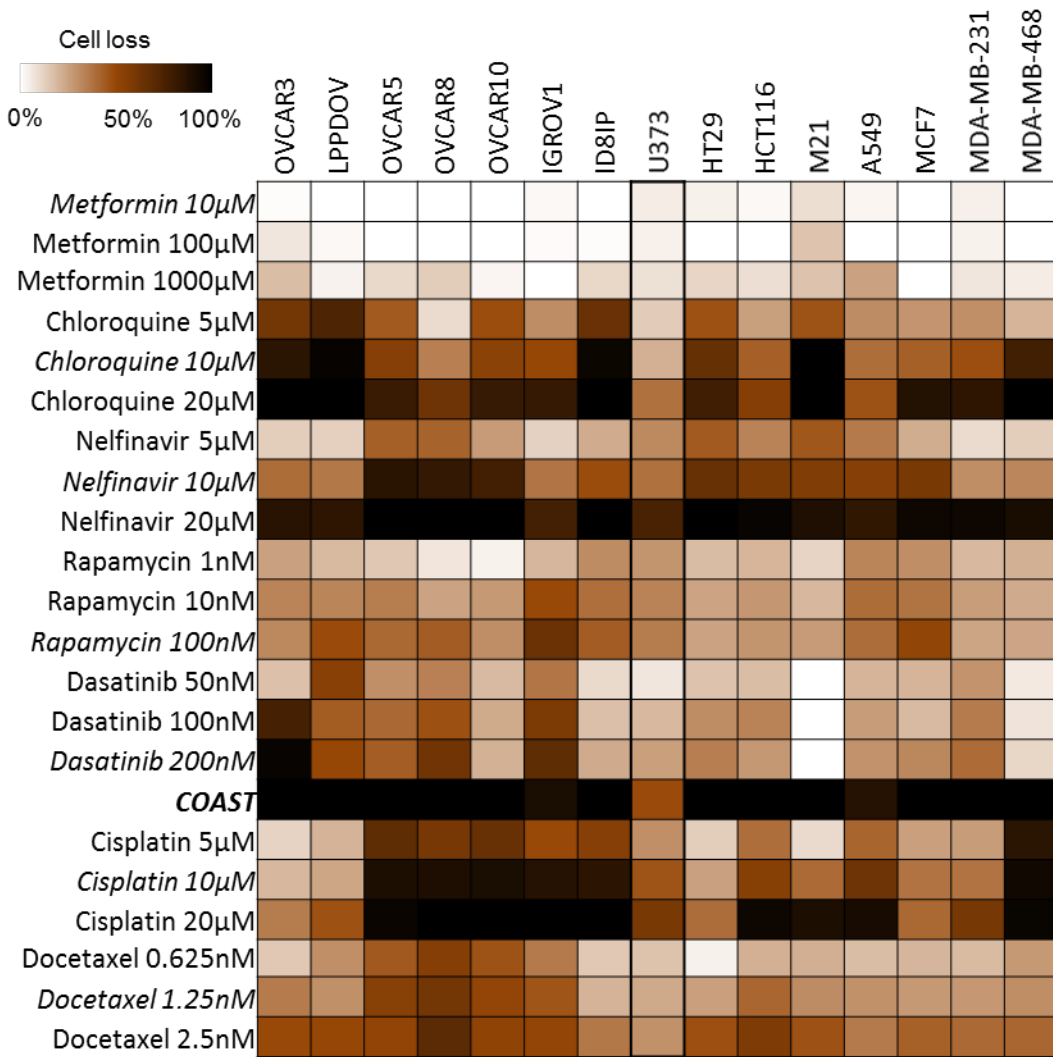

**Supplementary Figure 10. Ovarian cancer cell lines are sensitive to autophagic drugs at physiological levels.** Five human ovarian cancer cell lines (OVs and IGROV1) (note that IGROV1 is unlikely to be serous OV), one low passage patient-derived ovarian cancer (LPPDOV), a mouse ovarian cancer (ID8-IP) and other cancer types are tested for their response to metformin (M), chloroquine (C), nelfinavir (N), rapamycin (R), and dasatinib (D) as well as the common chemotherapeutics cisplatin and docetaxel for reference. Control U373 glioblastoma cells exhibit much less proteotoxic death than any other cancer line. Other cancer types: colorectal (HT29, HCT116), melanoma (M21), lung (A549), and breast (MCF7, MDA-MB-231). Growth is measured by a 48 hour crystal violet assay. Peak blood concentration of drug is indicated in italics. Here, the combination of M,C,N,R, and D at 10μM, 10μM, 10μM, 10nM, and 50nM, is used as COAST, respectively. Mean data from three independent experiments are shown.

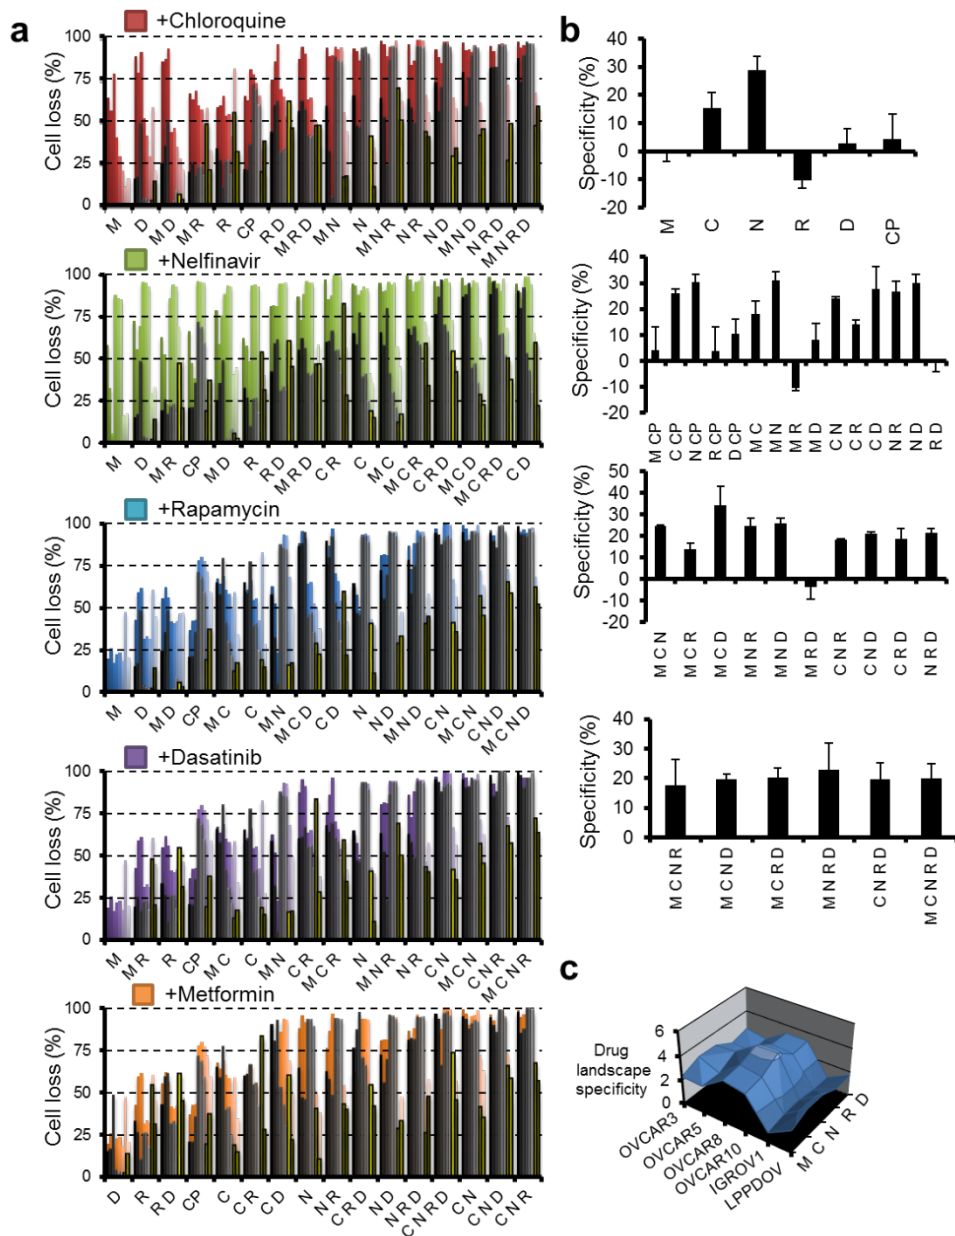

**Supplementary Figure 11. Fully combinatorial autophagy drug studies indicate COAST is more effective than single drugs.** (a) Crystal violet proliferation assays were performed in OVCAR3,5,8,10 cells (grey bars, in order) and autophagy competent (see Supplementary Figure 14) IGROV1 and U373 cells (yellow bars, in order). Each panel shows N-1 drug combinations on the x-axis, with the added drug growth inhibition indicated by the color bars superimposed behind the growth inhibition of the drug indicated on the x-axis. Higher colored bars indicate additivity of the tested drug as compared to a lower order combination. CP indicates cisplatin, at 10 $\mu$ M. Other drugs are at standard COAST concentrations (metformin, M, 10 $\mu$ M, chloroquine, C, 10 $\mu$ M, nelfinavir, N, 10 $\mu$ M, rapamycin, R, 10nM, and/or dasatinib, D, 50nM). Data are from eleven independent experiments, with mean values shown. (b) Specificity of drugs and combinations determined from the data in (a); the average of autophagy competent (U373 and IGROV1) lines' growth inhibition is subtracted from the average of autophagy deficient lines' growth inhibition. Mean values  $\pm$  s.e.m. shown. (c) Drug landscape specificity indicates Log<sub>2</sub> percent increases in cell loss averaged across 17 drug combinations containing the indicated drug when compared to *de-facto* resistant cell line U373. All OVs tested with the exception of IGROV1 show increased sensitivity to COAST drug combinations.

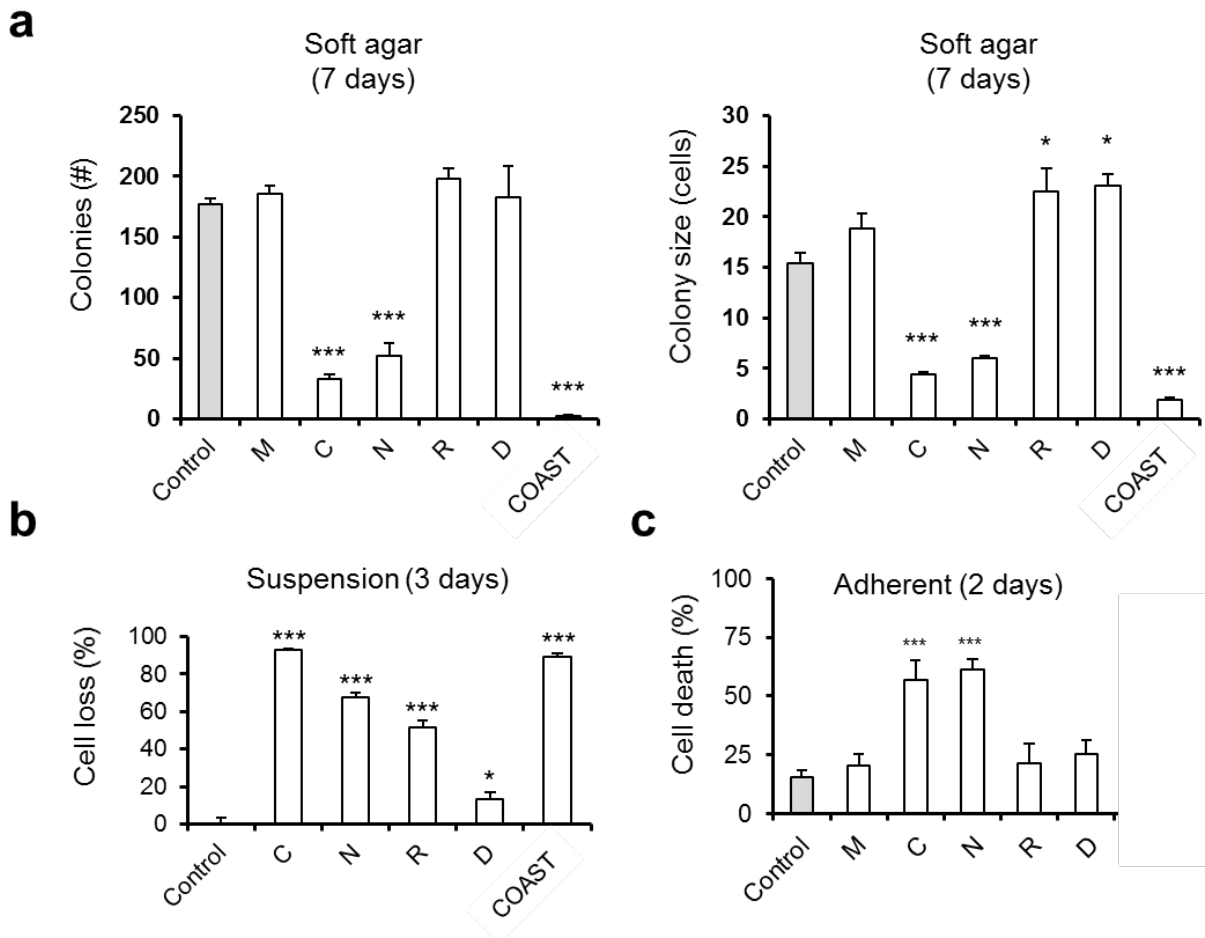

**Supplementary Figure 12. Cytotoxicity of COAST drugs in colony formation and suspension.** (a) OVCAR3 cells were embedded in soft agar and allowed to proliferate for 7 days following treatment with the indicated drugs (COAST component drugs which included metformin (M, 10 $\mu$ M), chloroquine (C, 10 $\mu$ M), nelfinavir (N, 10 $\mu$ M), rapamycin (R, 10nM), and/or dasatinib (D, 50nM), COAST is the five drug combination). Experiment was performed three times with a representative mean $\pm$ s.e.m. shown, \* $p$ <0.05, \*\*\* $p$ <0.001 by two-tailed student's t-test. (b) OVCAR3 cells were grown in polyHEMA plates to force cells into a non-adherent state and tested for drug sensitivity as in (a) for 72 hours of growth. Trypan blue was used to measure cell viability and a ViCell cell counter was used to measure cell counts. Experiment was performed three times with combined mean $\pm$ s.e.m. shown, \* $p$ <0.05, \*\*\* $p$ <0.001 by two-tailed student's t-test. (c) PI staining as a proxy of cell death of adherently grown OVCAR3 cells treated with the indicated drugs for 48 hours, as measured by flow cytometry. Experiment was performed three times with combined mean $\pm$ s.e.m. shown, \*\*\* $p$ <0.001 by two-tailed student's t-test.

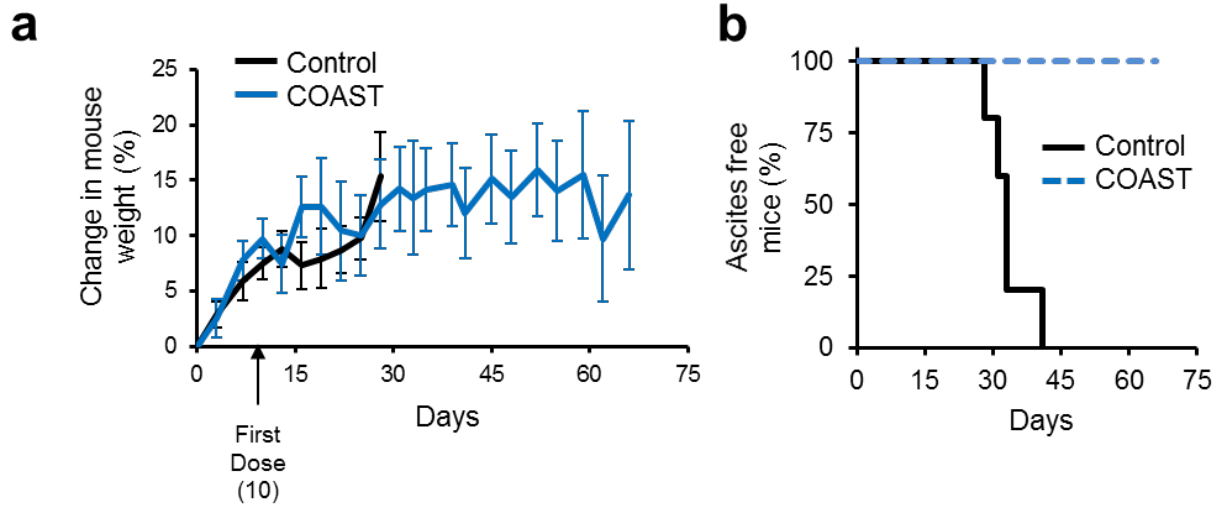

**Supplementary Figure 13. Longer term COAST therapy does not yield weight loss systemic toxicity.** C57BL/6 mice were inoculated IP with ID8-IP tumors and then treated by gavage with COAST identically as in Fig. 4, except for 8 weeks rather than 2 weeks. The mice never lost weight during the course of therapy (a), even long after all control mice were euthanized due to ascites-induced morbidity (b).

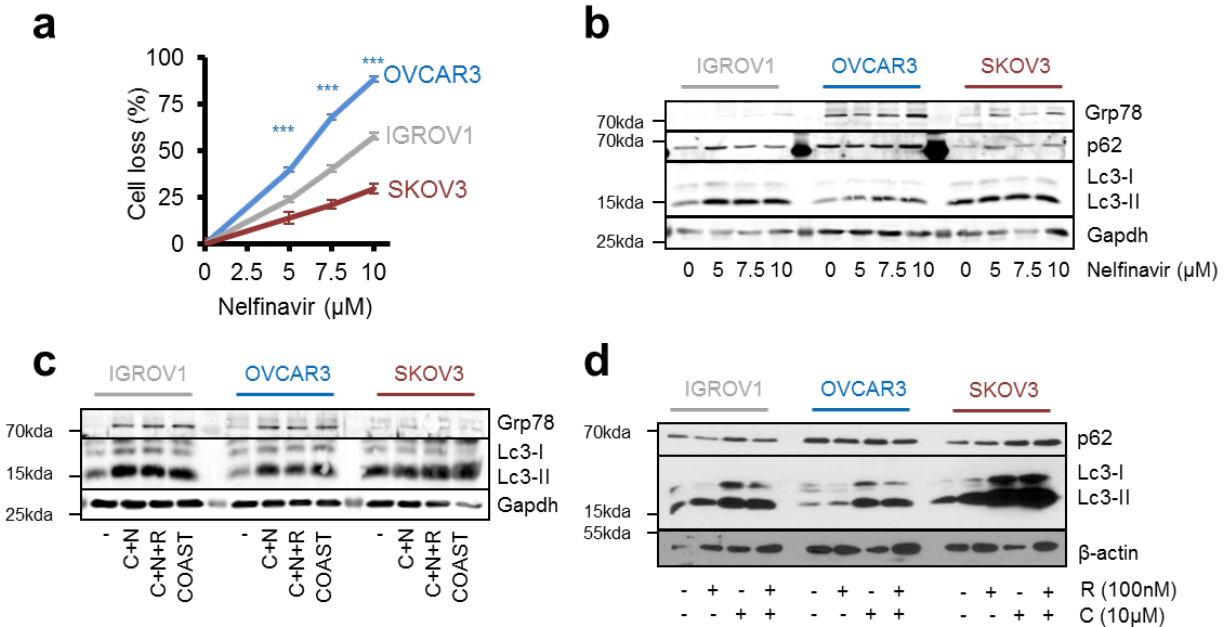

**Supplementary Figure 14. Inadequate autophagy in OVCAR3 following nelfinavir drug treatment.** (a) Crystal violet viability assay after 48 hours of nelfinavir treatment. Data represent the mean  $\pm$  s.e.m. from eight independent experiments.  $***p < 0.001$  by two-tailed student's t-test, comparing OVCAR3 to either IGROV1 or SKOV3 (all are  $***$ ). (b-d) Western blots of autophagosomal Lc3-II indicate reduced accumulation of autophagosomes in OVCAR3 and increased levels of ER-stress marker Grp78 when treated with nelfinavir (b), combinations of drugs (c) including chloroquine (10 $\mu$ M, C), nelfinavir (10 $\mu$ M, N), rapamycin (R, 10nM), or more (COAST, which additionally includes metformin 10 $\mu$ M and dasatinib 50nM), or with combinations of the autophagy activator rapamycin with the autophagy clearance inhibitor chloroquine (d). Lysates were generated 24h after initiation of treatment. Lysates from three independent experiments were analyzed and a representative blot is shown.

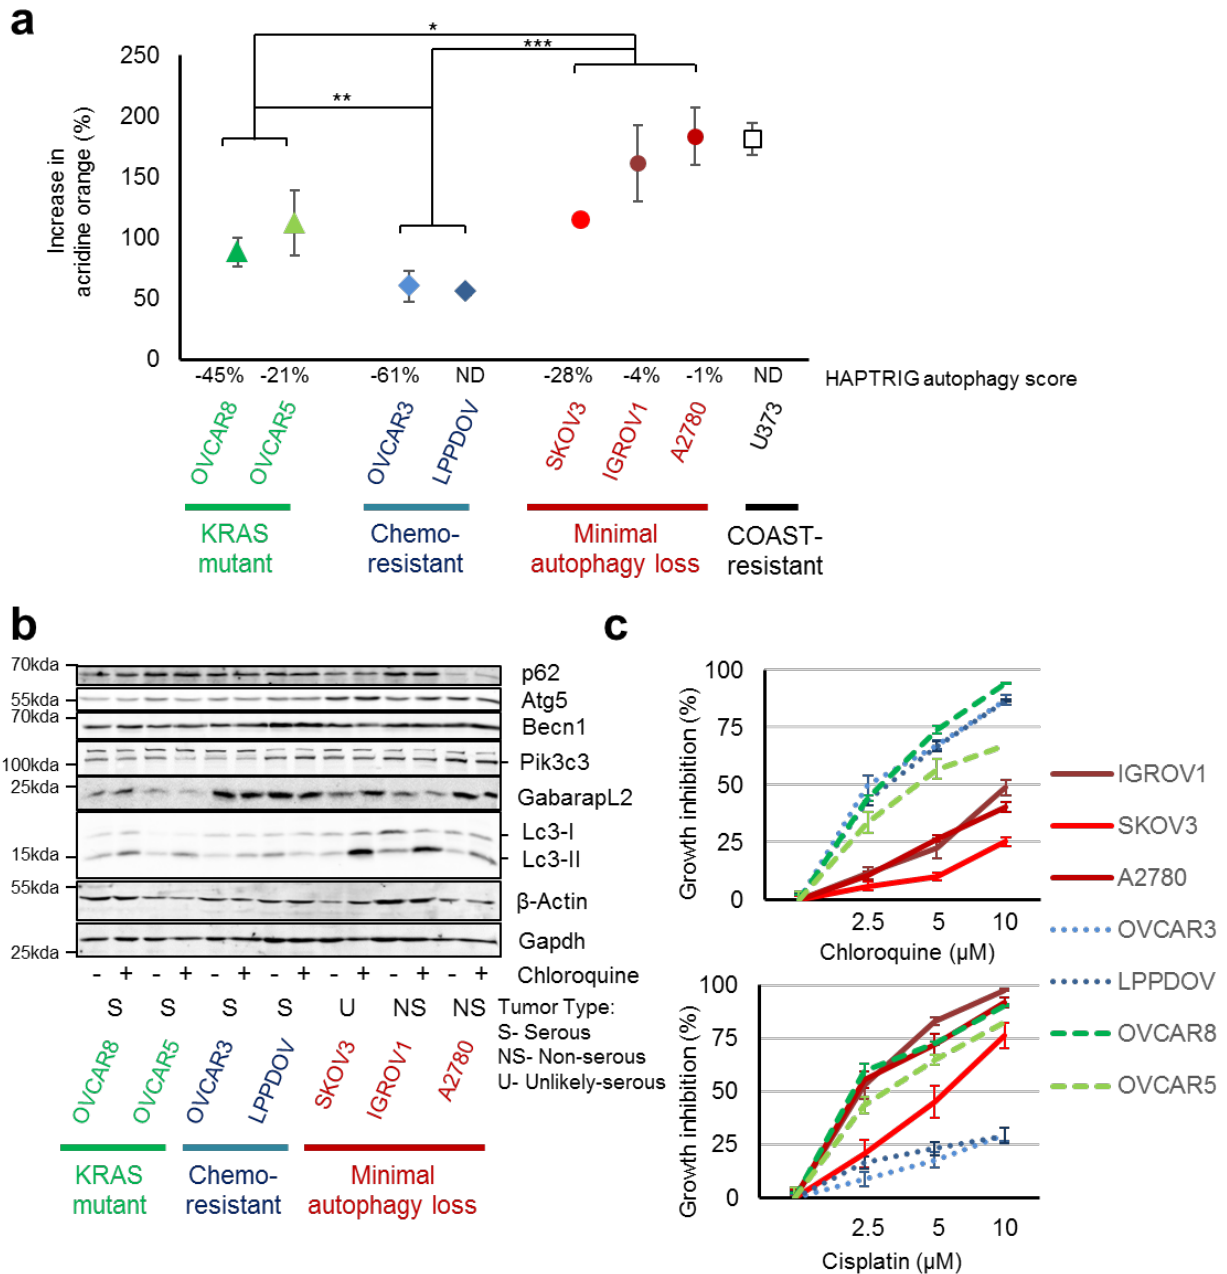

**Supplementary Figure 15. Additional OV cell lines tested for autophagy.** Related to Fig. 4. (a) OVCAR3 and LPPDOV have delayed accumulation of acidic vacuoles including autophagosomes and lysosomes, as measured by acridine orange flow cytometry, when treated with the autophagy/lysosome inhibitor chloroquine (10 $\mu$ M, 24h). *KRAS* mutant but autophagy gene-deleted OVCAR8 and OVCAR5 have somewhat less of a delay, compared to cell lines with less core autophagy gene deletions: SKOV3, IGROV1, and A2780. HAPTRIG autophagy pathway scores are shown for comparison, when data are available (if not, then "ND"). Data represent the mean  $\pm$  s.e.m. from three independent experiments. (b) Western blots of autophagosomal Lc3-II and other autophagy genes for the cell lines tested throughout this paper. Lysates from three independent experiments were analyzed and a representative blot is shown. Chloroquine treatment was 24h. (c) Crystal violet 48h cell death assays are shown for all cell lines for comparison. Of note, cisplatin resistance is not associated with chloroquine resistance.



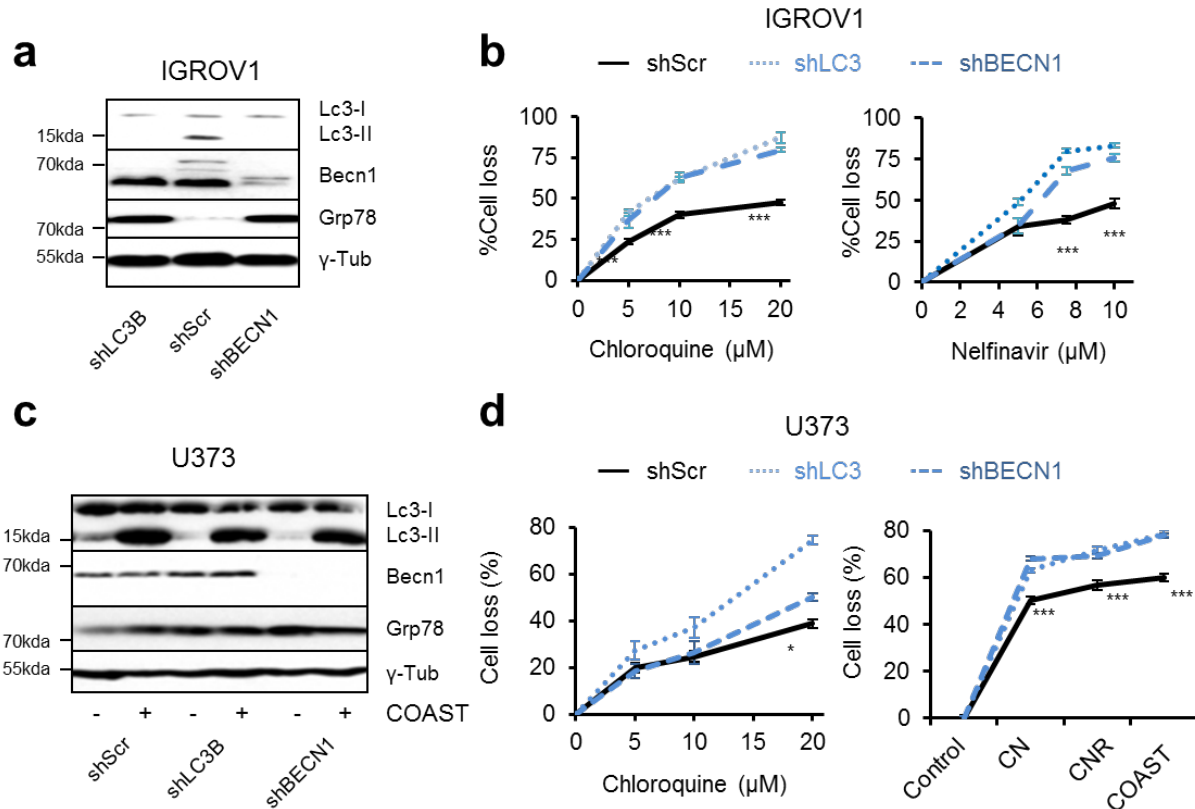

**Supplementary Figure 16. LC3 and BECN1 gene suppression sensitizes IGROV1 and U373 cells to COAST.** (a) IGROV1, a non-serous and autophagy competent ovarian cancer, was stably knocked down for the genes *LC3* and *BECN1*. Moderate knockdown clones (n=2) were selected for subsequent tests as a haploinsufficient mimetic. Lysates from three independent experiments were analyzed and a representative blot is shown. (b) Proliferation assays of IGROV1 knockdown cells in the presence of the COAST drugs chloroquine or nelfinavir. Data represent the mean  $\pm$  s.e.m. from five independent experiments. \*\*\*p<0.001 by two-tailed student's t-test, indicating shScr is less sensitive than both shBECN1 and shLC3. (c) U373, a cell line found to be resistant to COAST drugs, was stably knocked down for the genes *LC3* and *BECN1*. Lysates from three independent experiments were analyzed and a representative blot is shown. (d) Proliferation assays of U373 knockdown cells in the presence chloroquine of COAST drug combinations (C, Chloroquine 10μM, N, Nelfinavir 10μM, R, Rapamycin 10nM, COAST is CNR plus 10μM metformin and 50nM dasatinib). Data represent the mean  $\pm$  s.e.m. from three independent experiments. \*p<0.05, \*\*\*p<0.001 by two-tailed student's t-test, indicating shScr is less sensitive than both shBECN1 and shLC3.

Fig. 4d

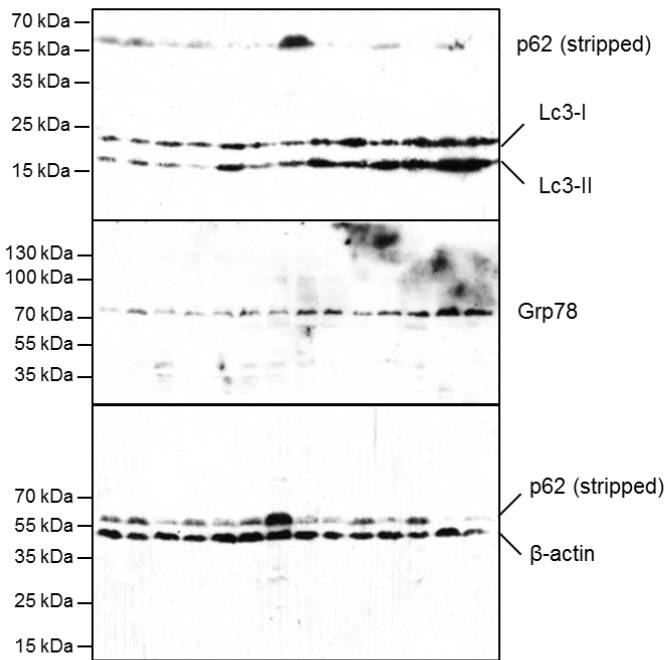

Fig. 5d

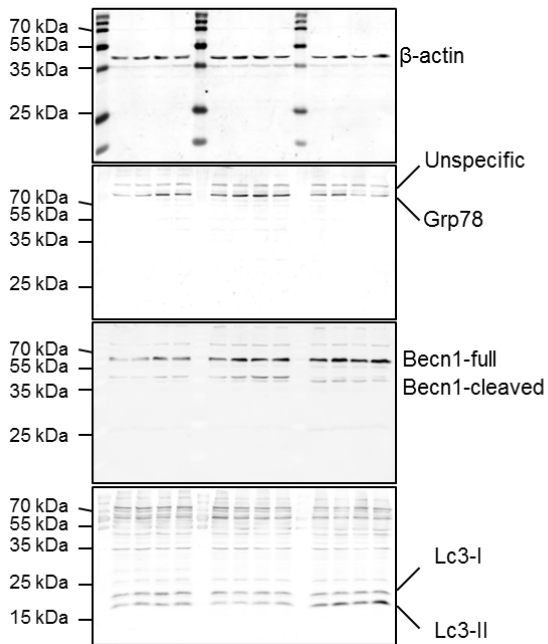

Fig. 5f

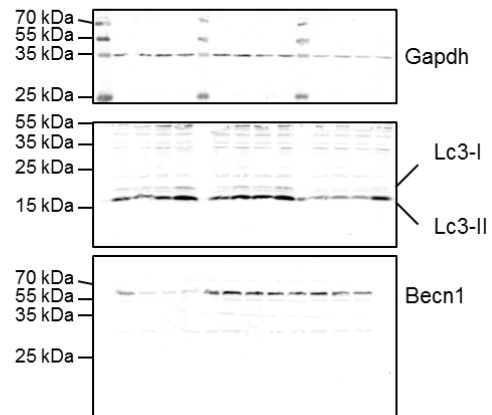

Supplementary Figure 17. Uncropped western blots.

| Pathway                                              | HAPTRIG Rank (-) | HAPTRIG Rank (+) | HAPTRIG Result    | HAPTRIG p value | HAPTRIG q value | GSEA Rank (-) | GSEA Rank (+) | Rank difference | GSEA NES | GSEA p-val | GSEA q-val |
|------------------------------------------------------|------------------|------------------|-------------------|-----------------|-----------------|---------------|---------------|-----------------|----------|------------|------------|
| Autophagy                                            | 1                |                  | Haploinsufficient | 6.13E-73        | 1.15E-70        | 10            |               | -9              | -1.45    | ns         | ns         |
| FoxO signaling pathway                               | 2                |                  | Haploinsufficient | 4.5E-70         | 8.42E-68        | 15            |               | -13             | -1.33    | ns         | ns         |
| Arginine and proline metabolism                      | 3                |                  | Haploinsufficient | 8.57E-70        | 1.60E-67        | 11            |               | -8              | -1.41    | ns         | ns         |
| Adipocytokine signaling pathway                      | 4                |                  | Haploinsufficient | 2.45E-66        | 4.58E-64        | 2             |               | 2               | -1.88    | 0.002      | ns         |
| Notch signaling pathway                              | 5                |                  | Haploinsufficient | 1.33E-63        | 2.49E-61        | 54            |               | -49             | -1.00    | ns         | ns         |
| Longevity regulating pathway                         | 6                |                  | Haploinsufficient | 1.74E-48        | 3.25E-46        | 28            |               | -22             | -1.16    | ns         | ns         |
| Fatty acid degradation                               | 7                |                  | Haploinsufficient | 1.05E-44        | 1.96E-42        | 1             |               | 6               | -2.05    | 0          | 0.004      |
| AMPK signaling pathway                               | 8                |                  | Haploinsufficient | 1.36E-43        | 2.54E-41        | 19            |               | -11             | -1.27    | ns         | ns         |
| Ubiquitin mediated proteolysis                       | 9                |                  | Haploinsufficient | 4.48E-41        | 8.38E-39        | 42            |               | -33             | -1.07    | ns         | ns         |
| Neuroactive ligand receptor interaction              | 10               |                  | Haploinsufficient | 5.49E-39        | 1.03E-36        | 22            |               | -12             | -1.26    | ns         | ns         |
| Retinol metabolism                                   | 11               |                  | Haploinsufficient | 5.69E-39        | 1.06E-36        | 6             |               | 5               | -1.62    | 0.031      | ns         |
| Huntington disease                                   | 12               |                  | Haploinsufficient | 1.83E-36        | 3.42E-34        | 23            |               | -11             | -1.23    | ns         | ns         |
| Glycolysis Gluconeogenesis                           | 13               |                  | Haploinsufficient | 2.1E-36         | 3.93E-34        | 3             |               | 10              | -1.73    | 0.01       | ns         |
| HIF1 signaling pathway                               | 14               |                  | Haploinsufficient | 9.13E-35        | 1.71E-32        | 9             |               | 5               | -1.54    | 0.019      | ns         |
| Lysosome                                             | 15               |                  | Haploinsufficient | 7.46E-34        | 1.40E-31        | 13            |               | 2               | -1.38    | 0.05       | ns         |
| Non small cell lung cancer                           | 16               |                  | Haploinsufficient | 5.48E-33        | 1.37E-30        |               | 38            | NA              | 0.96     | ns         | ns         |
| Thyroid hormone signaling pathway                    | 17               |                  | Haploinsufficient | 5.53E-31        | 1.03E-28        | 31            |               | -14             | -1.14    | ns         | ns         |
| Fanconi anemia pathway                               | 18               |                  | Haploinsufficient | 2.58E-30        | 4.82E-28        | 30            |               | -12             | -1.15    | ns         | ns         |
| Epstein Barr virus infection                         | 19               |                  | Haploinsufficient | 8.01E-30        | 1.50E-27        | 39            |               | -20             | -1.07    | ns         | ns         |
| Renal cell carcinoma                                 | 20               |                  | Haploinsufficient | 5.13E-27        | 9.59E-25        | 40            |               | -20             | -1.07    | ns         | ns         |
| Glucagon signaling pathway                           | 21               |                  | Haploinsufficient | 4.25E-26        | 7.95E-24        | 48            |               | -27             | -1.04    | ns         | ns         |
| Chronic myeloid leukemia                             | 22               |                  | Haploinsufficient | 9.42E-26        | 1.76E-23        |               | 36            | NA              | 0.99     | ns         | ns         |
| Viral myocarditis                                    | 23               |                  | Haploinsufficient | 1.36E-24        | 2.54E-22        | 68            |               | -45             | -0.93    | ns         | ns         |
| p53 signaling pathway                                | 24               |                  | Haploinsufficient | 2.46E-24        | 4.60E-22        | 50            |               | -26             | -1.01    | ns         | ns         |
| Protein processing in endoplasmic reticulum          | 25               |                  | Haploinsufficient | 5.62E-24        | 1.05E-21        | 58            |               | -33             | -0.96    | ns         | ns         |
| Viral carcinogenesis                                 | 26               |                  | Haploinsufficient | 6.8E-23         | 1.27E-20        | 41            |               | -15             | -1.07    | ns         | ns         |
| Biosynthesis of amino acids                          | 27               |                  | Haploinsufficient | 1.31E-22        | 2.45E-20        | 59            |               | -32             | -0.95    | ns         | ns         |
| Transcriptional misregulation in cancer              | 28               |                  | Haploinsufficient | 2.17E-22        | 4.06E-20        | 61            |               | -33             | -0.94    | ns         | ns         |
| mTOR signaling pathway                               | 29               |                  | Haploinsufficient | 4.23E-22        | 7.91E-20        | 27            |               | 2               | -1.19    | ns         | ns         |
| Insulin secretion                                    | 30               |                  | Haploinsufficient | 7.79E-22        | 1.46E-19        | 84            |               | -54             | -0.84    | ns         | ns         |
| TNF signaling pathway                                | 31               |                  | Haploinsufficient | 1.07E-20        | 2.00E-18        | 34            |               | -3              | -1.12    | ns         | ns         |
| AGE RAGE signaling pathway in diabetic complications | 32               |                  | Haploinsufficient | 1.27E-20        | 2.37E-18        | 33            |               | -1              | -1.13    | ns         | ns         |
| Cytokine cytokine receptor interaction               | 33               |                  | Haploinsufficient | 8.96E-20        | 1.68E-17        | 4             |               | 29              | -1.64    | 0.001      | ns         |
| Apoptosis                                            | 34               |                  | Haploinsufficient | 1.1E-19         | 2.06E-17        | 95            |               | -61             | -0.81    | ns         | ns         |
| Herpes simplex infection                             | 35               |                  | Haploinsufficient | 1.96E-19        | 3.67E-17        | 80            |               | -45             | -0.87    | ns         | ns         |
| RNA degradation                                      | 36               |                  | Haploinsufficient | 3.84E-19        | 7.18E-17        | 20            |               | 16              | -1.26    | ns         | ns         |
| Starch and sucrose metabolism                        | 37               |                  | Haploinsufficient | 1.34E-18        | 2.51E-16        | 17            |               | 20              | -1.29    | ns         | ns         |
| PPAR signaling pathway                               | 38               |                  | Haploinsufficient | 1.88E-18        | 3.52E-16        | 102           |               | -64             | -0.77    | ns         | ns         |
| Endometrial cancer                                   | 39               |                  | Haploinsufficient | 2E-18           | 3.74E-16        | 94            |               | -55             | -0.81    | ns         | ns         |
| Basal transcription factors                          | 40               |                  | Haploinsufficient | 3E-18           | 5.61E-16        | 92            |               | -52             | -0.82    | ns         | ns         |
| Inositol phosphate metabolism                        | 41               |                  | Haploinsufficient | 3.74E-18        | 6.99E-16        | 43            |               | -2              | -1.07    | ns         | ns         |
| Pancreatic cancer                                    | 42               |                  | Haploinsufficient | 8.04E-18        | 1.50E-15        | 118           |               | -76             | -0.63    | ns         | ns         |
| Fc epsilon RI signaling pathway                      | 43               |                  | Haploinsufficient | 1.08E-17        | 2.02E-15        | 99            |               | -56             | -0.80    | ns         | ns         |
| Acute myeloid leukemia                               | 44               |                  | Haploinsufficient | 1.47E-17        | 2.75E-15        | 122           |               | -78             | -0.58    | ns         | ns         |
| Vasopressin-regulated water reabsorption             | 45               |                  | Haploinsufficient | 3.08E-17        | 5.76E-15        | 21            |               | 24              | -1.26    | ns         | ns         |
| NF kappa B signaling pathway                         | 46               |                  | Haploinsufficient | 4.48E-17        | 8.38E-15        | 93            |               | -47             | -0.82    | ns         | ns         |
| Alcoholism                                           | 47               |                  | Haploinsufficient | 5.31E-17        | 9.93E-15        | 91            |               | -44             | -0.82    | ns         | ns         |
| Pantothenate and CoA biosynthesis                    | 48               |                  | Haploinsufficient | 5.41E-17        | 1.01E-14        | 83            |               | -35             | -0.85    | ns         | ns         |
| Oxidative phosphorylation                            | 49               |                  | Haploinsufficient | 1.08E-16        | 2.02E-14        | 88            |               | -39             | -0.82    | ns         | ns         |
| Phagosome                                            | 50               |                  | Haploinsufficient | 1.58E-16        | 2.95E-14        | 116           |               | -66             | -0.65    | ns         | ns         |
| SNARE interactions in vesicular transport            | 51               |                  | Haploinsufficient | 2.17E-16        | 4.06E-14        | 37            |               | 14              | -1.10    | ns         | ns         |
| Colorectal cancer                                    | 52               |                  | Haploinsufficient | 3.48E-16        | 6.51E-14        | 82            |               | -30             | -0.86    | ns         | ns         |
| Toll like receptor signaling pathway                 | 53               |                  | Haploinsufficient | 1.43E-15        | 2.67E-13        | 98            |               | -45             | -0.81    | ns         | ns         |
| RIG I like receptor signaling pathway                | 54               |                  | Haploinsufficient | 4.32E-15        | 8.08E-13        | 56            |               | -2              | -0.98    | ns         | ns         |
| Purine metabolism                                    | 55               |                  | Haploinsufficient | 1.37E-14        | 2.56E-12        | 55            |               | 0               | -0.99    | ns         | ns         |
| Influenza A                                          | 56               |                  | Haploinsufficient | 1.39E-14        | 2.60E-12        | 121           |               | -65             | -0.59    | ns         | ns         |
| Metabolism of xenobiotics by cytochrome P450         | 57               |                  | Haploinsufficient | 1.09E-09        | 2.04E-07        | 7             |               | 50              | -1.57    | 0.027      | ns         |
| Chemical carcinogenesis                              | 58               |                  | Haploinsufficient | 2.27E-09        | 4.24E-07        | 5             |               | 53              | -1.62    | 0.015      | ns         |
| Glycerophospholipid metabolism                       |                  | 1                | Triploproficient  | 1.81E-63        | 3.38E-61        |               | 19            | -18             | 1.18     | ns         | ns         |
| Glycerolipid metabolism                              |                  | 2                | Triploproficient  | 1.12E-58        | 2.09E-56        |               | 3             | -1              | 1.64     | 0.018      | ns         |
| ECM receptor interaction                             |                  | 3                | Triploproficient  | 2.13E-56        | 3.98E-54        |               | 4             | -1              | 1.63     | 0.023      | ns         |
| Oxytocin signaling pathway                           |                  | 4                | Triploproficient  | 1.42E-51        | 2.66E-49        |               | 7             | -3              | 1.43     | 0.03       | ns         |
| Complement and coagulation cascades                  |                  | 5                | Triploproficient  | 2.71E-47        | 5.07E-45        |               | 1             | 4               | 2.03     | 0          | 0.022      |
| Small cell lung cancer                               |                  | 6                | Triploproficient  | 5.3E-46         | 9.91E-44        |               | 6             | 0               | 1.60     | 0.021      | ns         |
| Focal adhesion                                       |                  | 7                | Triploproficient  | 1.73E-32        | 3.24E-30        |               | 23            | -16             | 1.12     | ns         | ns         |
| Wnt signaling pathway                                |                  | 8                | Triploproficient  | 8.35E-32        | 1.56E-29        | 51            |               | NA              | -1.01    | ns         | ns         |
| RNA transport                                        |                  | 9                | Triploproficient  | 3.41E-29        | 6.38E-27        |               | 29            | -20             | 1.02     | ns         | ns         |
| N-Glycan biosynthesis                                |                  | 10               | Triploproficient  | 6.61E-29        | 1.24E-26        |               | 26            | -16             | 1.07     | ns         | ns         |
| Hippo signaling pathway                              |                  | 11               | Triploproficient  | 1.42E-28        | 2.66E-26        |               | 45            | -34             | 0.91     | ns         | ns         |
| Cell adhesion molecules (CAMs)                       |                  | 12               | Triploproficient  | 2.04E-28        | 3.81E-26        |               | 5             | 7               | 1.62     | 0.006      | ns         |
| MAPK signaling pathway                               |                  | 13               | Triploproficient  | 3.13E-28        | 5.85E-26        | 75            |               | NA              | -0.89    | ns         | ns         |
| Platelet activation                                  |                  | 14               | Triploproficient  | 3.6E-28         | 6.73E-26        |               | 9             | 5               | 1.34     | ns         | ns         |
| Lysine degradation                                   |                  | 15               | Triploproficient  | 9.43E-28        | 1.76E-25        |               | 22            | -7              | 1.13     | ns         | ns         |
| Vascular smooth muscle contraction                   |                  | 16               | Triploproficient  | 3.01E-27        | 5.63E-25        |               | 13            | 3               | 1.27     | ns         | ns         |
| Peroxisome                                           |                  | 17               | Triploproficient  | 3.51E-27        | 6.56E-25        |               | 37            | -20             | 0.98     | ns         | ns         |
| Prolactin signaling pathway                          |                  | 18               | Triploproficient  | 5.81E-27        | 1.09E-24        |               | 44            | -26             | 0.91     | ns         | ns         |
| Cell cycle                                           |                  | 19               | Triploproficient  | 3.94E-26        | 7.37E-24        | 70            |               | NA              | -0.91    | ns         | ns         |

|                                                          |    |                  |          |          |     |    |     |       |       |    |    |
|----------------------------------------------------------|----|------------------|----------|----------|-----|----|-----|-------|-------|----|----|
| Serotonergic synapse                                     | 20 | Triploproficient | 4.85E-26 | 9.07E-24 |     | 16 | 4   | 1.22  | ns    | ns |    |
| Pancreatic secretion                                     | 21 | Triploproficient | 9.67E-26 | 1.81E-23 |     | 15 | 6   | 1.23  | ns    | ns |    |
| Signaling pathways regulating pluripotency of stem cells | 22 | Triploproficient | 1.74E-25 | 3.25E-23 | 110 |    | NA  | -0.71 | ns    | ns |    |
| Central carbon metabolism in cancer                      | 23 | Triploproficient | 5.18E-25 | 9.69E-23 | 114 |    | NA  | -0.67 | ns    | ns |    |
| Dilated cardiomyopathy                                   | 24 | Triploproficient | 2.02E-24 | 3.78E-22 |     | 20 | 4   | 1.16  | ns    | ns |    |
| PI3K Akt signaling pathway                               | 25 | Triploproficient | 2.09E-24 | 3.91E-22 | 71  |    | NA  | -0.91 | ns    | ns |    |
| Melanogenesis                                            | 26 | Triploproficient | 4E-24    | 7.48E-22 | 74  |    | NA  | -0.89 | ns    | ns |    |
| Gastric acid secretion                                   | 27 | Triploproficient | 5.17E-24 | 9.67E-22 |     | 21 | 6   | 1.14  | ns    | ns |    |
| Ribosome biogenesis in eukaryotes                        | 28 | Triploproficient | 1.64E-22 | 3.07E-20 | 72  |    | NA  | -0.91 | ns    | ns |    |
| mRNA surveillance pathway                                | 29 | Triploproficient | 1.84E-22 | 3.44E-20 |     | 11 | 18  | 1.33  | ns    | ns |    |
| Glycosylphosphatidylinositol (GPI) anchor biosynthesis   | 30 | Triploproficient | 1.94E-22 | 3.63E-20 |     | 24 | 6   | 1.11  | ns    | ns |    |
| Morphine addiction                                       | 31 | Triploproficient | 1.42E-21 | 2.66E-19 |     | 51 | -20 | 0.83  | ns    | ns |    |
| Circadian entrainment                                    | 32 | Triploproficient | 1.42E-21 | 2.66E-19 | 73  |    | NA  | -0.89 | ns    | ns |    |
| Spliceosome                                              | 33 | Triploproficient | 2.17E-21 | 4.06E-19 |     | 31 | 2   | 1.02  | ns    | ns |    |
| Fc gamma R-mediated phagocytosis                         | 34 | Triploproficient | 2.24E-21 | 4.19E-19 |     | 48 | -14 | 0.88  | ns    | ns |    |
| Hypertrophic cardiomyopathy (HCM)                        | 35 | Triploproficient | 1.06E-20 | 1.98E-18 |     | 18 | 17  | 1.19  | ns    | ns |    |
| Hepatitis B                                              | 36 | Triploproficient | 2.15E-20 | 4.02E-18 |     | 61 | -25 | 0.69  | ns    | ns |    |
| Regulation of actin cytoskeleton                         | 37 | Triploproficient | 2.27E-20 | 4.24E-18 |     | 89 |     | NA    | -0.82 | ns | ns |
| Insulin resistance                                       | 38 | Triploproficient | 9.69E-20 | 1.81E-17 | 49  |    | NA  | -1.02 | ns    | ns |    |
| Adrenergic signaling in cardiomyocytes                   | 39 | Triploproficient | 9.87E-20 | 1.85E-17 |     | 17 | 22  | 1.21  | ns    | ns |    |
| Cholinergic synapse                                      | 40 | Triploproficient | 1.81E-19 | 3.38E-17 |     | 40 | 0   | 0.95  | ns    | ns |    |
| Axon guidance                                            | 41 | Triploproficient | 2.25E-19 | 4.21E-17 |     | 10 | 31  | 1.34  | ns    | ns |    |
| Prostate cancer                                          | 42 | Triploproficient | 2.58E-19 | 4.82E-17 | 66  |    | NA  | -0.93 | ns    | ns |    |
| Arrhythmogenic right ventricular cardiomyopathy (ARVC)   | 43 | Triploproficient | 3.23E-19 | 6.04E-17 |     | 27 | 16  | 1.05  | ns    | ns |    |
| Retrograde endocannabinoid signaling                     | 44 | Triploproficient | 2.43E-18 | 4.54E-16 |     | 28 | 16  | 1.03  | ns    | ns |    |
| Shigellosis                                              | 45 | Triploproficient | 3.01E-18 | 5.63E-16 |     | 50 | -5  | 0.85  | ns    | ns |    |
| Basal cell carcinoma                                     | 46 | Triploproficient | 1.22E-17 | 2.28E-15 | 57  |    | NA  | -0.96 | ns    | ns |    |
| GABAergic synapse                                        | 47 | Triploproficient | 2.23E-17 | 4.17E-15 | 109 |    | NA  | -0.72 | ns    | ns |    |
| Chemokine signaling pathway                              | 48 | Triploproficient | 2.7E-17  | 5.05E-15 | 8   |    | NA  | -1.56 | 0.007 | ns |    |
| Gap junction                                             | 49 | Triploproficient | 3.26E-17 | 6.10E-15 | 26  |    | NA  | -1.19 | ns    | ns |    |
| Dopaminergic synapse                                     | 50 | Triploproficient | 3.43E-17 | 6.41E-15 |     | 47 | 3   | 0.90  | ns    | ns |    |
| HTLV-I infection                                         | 51 | Triploproficient | 9.94E-17 | 1.86E-14 | 60  |    | NA  | -0.94 | ns    | ns |    |
| Renin secretion                                          | 52 | Triploproficient | 3.42E-16 | 6.40E-14 |     | 12 | 40  | 1.30  | ns    | ns |    |
| Bacterial invasion of epithelial cells                   | 53 | Triploproficient | 4.79E-16 | 8.96E-14 | 29  |    | NA  | -1.15 | ns    | ns |    |
| Bladder cancer                                           | 54 | Triploproficient | 1.75E-15 | 3.27E-13 |     | 34 | 20  | 1.01  | ns    | ns |    |
| Salivary secretion                                       | 55 | Triploproficient | 2.89E-15 | 5.40E-13 |     | 57 | -2  | 0.75  | ns    | ns |    |
| cGMP PKG signaling pathway                               | 56 | Triploproficient | 3.07E-15 | 5.74E-13 |     | 39 | 17  | 0.95  | ns    | ns |    |
| Malaria                                                  | 57 | Triploproficient | 3.26E-15 | 6.10E-13 | 113 |    | NA  | -0.69 | ns    | ns |    |
| Proteoglycans in cancer                                  | 58 | Triploproficient | 3.33E-15 | 6.23E-13 | 87  |    | NA  | -0.82 | ns    | ns |    |
| Rap1 signaling pathway                                   | 59 | Triploproficient | 4.26E-15 | 7.97E-13 | 96  |    | NA  | -0.81 | ns    | ns |    |
| Pathogenic Escherichia coli infection                    | 60 | Triploproficient | 7.03E-15 | 1.31E-12 |     | 8  | 52  | 1.40  | ns    | ns |    |
| Insulin signaling pathway                                | 61 | Triploproficient | 1.44E-14 | 2.69E-12 | 85  |    | NA  | -0.84 | ns    | ns |    |
| Salmonella infection                                     | 62 | Triploproficient | 2.48E-14 | 4.64E-12 |     | 60 | 2   | 0.71  | ns    | ns |    |
| Oocyte meiosis                                           | 63 | Triploproficient | 2.81E-14 | 5.25E-12 |     | 56 | 7   | 0.75  | ns    | ns |    |
| Neurotrophin signaling pathway                           | 64 | Triploproficient | 3.42E-14 | 6.40E-12 | 47  |    | NA  | -1.04 | ns    | ns |    |
| MicroRNAs in cancer                                      | 65 | Triploproficient | 4.76E-14 | 8.90E-12 | 24  |    | NA  | -1.23 | ns    | ns |    |
| ErbB signaling pathway                                   | 66 | Triploproficient | 5.28E-14 | 9.87E-12 |     | 46 | 20  | 0.90  | ns    | ns |    |
| Long-term depression                                     | 67 | Triploproficient | 5.8E-14  | 1.08E-11 | 35  |    | NA  | -1.11 | ns    | ns |    |
| Adherens junction                                        | 68 | Triploproficient | 5.91E-14 | 1.11E-11 | 106 |    | NA  | -0.75 | ns    | ns |    |
| Parkinson disease                                        | 69 | Triploproficient | 8.08E-14 | 1.51E-11 | 77  |    | NA  | -0.88 | ns    | ns |    |
| Estrogen signaling pathway                               | 70 | Triploproficient | 8.1E-14  | 1.51E-11 |     | 30 | 40  | 1.02  | ns    | ns |    |
| Aldosterone synthesis and secretion                      | 71 | Triploproficient | 8.11E-14 | 1.52E-11 |     | 49 | 22  | 0.85  | ns    | ns |    |
| Leukocyte transendothelial migration                     | 72 | Triploproficient | 8.49E-14 | 1.59E-11 | 97  |    | NA  | -0.81 | ns    | ns |    |
| Glioma                                                   | 73 | Triploproficient | 9.35E-14 | 1.75E-11 | 69  |    | NA  | -0.92 | ns    | ns |    |
| Amoebiasis                                               | 74 | Triploproficient | 1.11E-13 | 2.08E-11 | 67  |    | NA  | -0.93 | ns    | ns |    |
| Natural killer cell mediated cytotoxicity                | 75 | Triploproficient | 1.49E-13 | 2.79E-11 | 117 |    | NA  | -0.64 | ns    | ns |    |
| Regulation of lipolysis in adipocytes                    | 76 | Triploproficient | 1.6E-13  | 2.99E-11 |     | 58 | 18  | 0.74  | ns    | ns |    |
| Inflammatory mediator regulation of TRP channels         | 77 | Triploproficient | 1.68E-13 | 3.14E-11 | 32  |    | NA  | -1.14 | ns    | ns |    |
| Alzheimer disease                                        | 78 | Triploproficient | 4.15E-13 | 7.76E-11 |     | 33 | 45  | 1.01  | ns    | ns |    |
| Phosphatidylinositol signaling system                    | 79 | Triploproficient | 5.59E-13 | 1.05E-10 |     | 25 | 54  | 1.10  | ns    | ns |    |
| Melanoma                                                 | 80 | Triploproficient | 7.34E-13 | 1.37E-10 | 81  |    | NA  | -0.87 | ns    | ns |    |
| Hedgehog signaling pathway                               | 81 | Triploproficient | 7.69E-13 | 1.44E-10 |     | 41 | 40  | 0.94  | ns    | ns |    |
| Non alcoholic fatty liver disease (NAFLD)                | 82 | Triploproficient | 1.09E-12 | 2.04E-10 | 65  |    | NA  | -0.93 | ns    | ns |    |
| Pathways in cancer                                       | 83 | Triploproficient | 1.21E-12 | 2.26E-10 | 64  |    | NA  | -0.93 | ns    | ns |    |
| Endocytosis                                              | 84 | Triploproficient | 1.4E-12  | 2.62E-10 | 79  |    | NA  | -0.87 | ns    | ns |    |
| cAMP signaling pathway                                   | 85 | Triploproficient | 1.67E-12 | 3.12E-10 | 76  |    | NA  | -0.88 | ns    | ns |    |
| Longevity regulating pathway multiple species            | 86 | Triploproficient | 2.73E-12 | 5.11E-10 | 120 |    | NA  | -0.61 | ns    | ns |    |
| Cardiac muscle contraction                               | 87 | Triploproficient | 2.76E-12 | 5.16E-10 |     | 43 | 44  | 0.92  | ns    | ns |    |
| TGF beta signaling pathway                               | 88 | Triploproficient | 4.87E-12 | 9.11E-10 |     | 54 | 34  | 0.77  | ns    | ns |    |
| Legionellosis                                            | 89 | Triploproficient | 4.96E-12 | 9.28E-10 |     | 63 | 26  | 0.64  | ns    | ns |    |
| GnRH signaling pathway                                   | 90 | Triploproficient | 6.08E-12 | 1.14E-09 | 36  |    | NA  | -1.11 | ns    | ns |    |
| Choline metabolism in cancer                             | 91 | Triploproficient | 7.11E-12 | 1.33E-09 | 100 |    | NA  | -0.79 | ns    | ns |    |
| Calcium signaling pathway                                | 92 | Triploproficient | 8.86E-12 | 1.66E-09 | 38  |    | NA  | -1.08 | ns    | ns |    |
| Amino sugar and nucleotide sugar metabolism              | 93 | Triploproficient | 1.45E-11 | 2.71E-09 | 112 |    | NA  | -0.70 | ns    | ns |    |
| Sphingolipid signaling pathway                           | 94 | Triploproficient | 1.76E-11 | 3.29E-09 | 44  |    | NA  | -1.06 | ns    | ns |    |
| ABC transporters                                         | 95 | Triploproficient | 2.07E-11 | 3.87E-09 |     | 42 | 53  | 0.93  | ns    | ns |    |
| Tight junction                                           | 96 | Triploproficient | 3.71E-11 | 6.94E-09 | 12  |    | NA  | -1.38 | ns    | ns |    |
| Primary immunodeficiency                                 | 97 | Triploproficient | 4.26E-11 | 7.97E-09 |     | 35 | 62  | 0.99  | ns    | ns |    |
| Hematopoietic cell lineage                               | 98 | Triploproficient | 3.61E-10 | 6.75E-08 |     | 14 | 84  | 1.25  | ns    | ns |    |
| Olfactory transduction                                   | 99 | Triploproficient | 4.33E-06 | 8.10E-04 |     | 2  | 97  | 1.71  | 0     | ns |    |

|                                           |  |              |    |    |     |    |    |       |    |    |
|-------------------------------------------|--|--------------|----|----|-----|----|----|-------|----|----|
| Drug metabolism cytochrome P450           |  | No Selection | ns | ns | 18  |    | NA | -1.29 | ns | ns |
| Glutathione metabolism                    |  | No Selection | ns | ns | 16  |    | NA | -1.31 | ns | ns |
| Nucleotide excision repair                |  | No Selection | ns | ns | 62  |    | NA | -0.94 | ns | ns |
| Osteoclast differentiation                |  | No Selection | ns | ns |     | 62 | NA | 0.66  | ns | ns |
| Inflammatory bowel disease (IBD)          |  | No Selection | ns | ns | 46  |    | NA | -1.05 | ns | ns |
| Chagas disease (American trypanosomiasis) |  | No Selection | ns | ns | 14  |    | NA | -1.34 | ns | ns |
| Leishmaniasis                             |  | No Selection | ns | ns | 119 |    | NA | -0.63 | ns | ns |
| Pertussis                                 |  | No Selection | ns | ns | 115 |    | NA | -0.66 | ns | ns |
| Taste transduction                        |  | No Selection | ns | ns | 52  |    | NA | -1.01 | ns | ns |
| Arachidonic acid metabolism               |  | No Selection | ns | ns | 45  |    | NA | -1.05 | ns | ns |
| Progesterone mediated oocyte maturation   |  | No Selection | ns | ns | 107 |    | NA | -0.73 | ns | ns |
| NOD like receptor signaling pathway       |  | No Selection | ns | ns | 53  |    | NA | -1.00 | ns | ns |
| Jak STAT signaling pathway                |  | No Selection | ns | ns | 111 |    | NA | -0.70 | ns | ns |
| Bile secretion                            |  | No Selection | ns | ns | 104 |    | NA | -0.77 | ns | ns |
| Tuberculosis                              |  | No Selection | ns | ns | 86  |    | NA | -0.83 | ns | ns |
| Fatty acid metabolism                     |  | No Selection | ns | ns | 108 |    | NA | -0.72 | ns | ns |
| Thyroid hormone synthesis                 |  | No Selection | ns | ns | 90  |    | NA | -0.82 | ns | ns |
| Cytosolic DNA-sensing pathway             |  | No Selection | ns | ns |     | 52 | NA | 0.83  | ns | ns |
| Cocaine addiction                         |  | No Selection | ns | ns | 105 |    | NA | -0.75 | ns | ns |
| Rheumatoid arthritis                      |  | No Selection | ns | ns | 78  |    | NA | -0.88 | ns | ns |
| Toxoplasmosis                             |  | No Selection | ns | ns |     | 32 | NA | 1.01  | ns | ns |
| Amphetamine addiction                     |  | No Selection | ns | ns |     | 59 | NA | 0.74  | ns | ns |
| Glutamatergic synapse                     |  | No Selection | ns | ns | 101 |    | NA | -0.78 | ns | ns |
| Measles                                   |  | No Selection | ns | ns |     | 64 | NA | 0.55  | ns | ns |
| B cell receptor signaling pathway         |  | No Selection | ns | ns |     | 55 | NA | 0.76  | ns | ns |
| Hepatitis C                               |  | No Selection | ns | ns | 103 |    | NA | -0.77 | ns | ns |
| Phospholipase D signaling pathway         |  | No Selection | ns | ns | 63  |    | NA | -0.94 | ns | ns |
| Carbon metabolism                         |  | No Selection | ns | ns |     | 65 | NA | 0.35  | ns | ns |
| Ras signaling pathway                     |  | No Selection | ns | ns | 25  |    | NA | -1.21 | ns | ns |
| T cell receptor signaling pathway         |  | No Selection | ns | ns |     | 53 | NA | 0.78  | ns | ns |

**Supplementary Table 1: Direct comparison of HAPTRIG to GSEA on OV/KEGG analysis**

GSEA was performed using identical parameters as used in HAPTRIG analysis presented here.

For p and q values, "ns" indicates p>0.05.

| Autophagy | Low      |           |           |           |           | High      |           |           |           |           |
|-----------|----------|-----------|-----------|-----------|-----------|-----------|-----------|-----------|-----------|-----------|
|           | 1        | 2         | 3         | 4         | 5         | 1         | 2         | 3         | 4         | 5         |
| BLCA      | ATG4B    | GABARAP   | ATG12     | ATG16L1   | MAP1LC3B  | BECN1     | ATG3      | ATG7      | PRKAA1    | PIK3R4    |
| BRCA      | MAP1LC3B | GABARAPL2 | GABARAP   | ATG4B     | ULK1      | PRKAA1    | MDM4      | WWP1      | CLN3      | TSC2      |
| CECSC     | GABARAP  | ATG4B     | ATG7      | ATG12     | MAP1LC3B  | ATG3      | PRKAA1    | PIK3R4    | PRKAA2    | BECN1     |
| COADREAD  | GABARAP  | PIK3C3    | ATG12     | HSP90AA1  | ULK2      | GABARAPL2 | MAP1LC3B  | ATG16L1   | ATG4B     | ATG4A     |
| GBM       | MAP1LC3B | GABARAPL2 | GABARAP   | ATG5      | ATG13     | ATG4D     | PRKAA2    | DNAJB1    | CASP3     | CASP8     |
| HNCS      | ATG7     | ATG12     | ATG4B     | GABARAP   | ATG10     | ATG3      | BECN1     | GABARAPL1 | PRKAA1    | PIK3R4    |
| KIRC      | ATG7     | ATG3      | PIK3C3    | BECN1     | HSP90AA1  | ATG12     | ATG4B     | ULK1      | GABARAPL1 | GABARAPL2 |
| KIRP      | HSPA5    | ATG4C     | MAP3K5    | ULK3      | DNAJB1    | BECN1     | GABARAPL2 | GABARAP   | MAP1LC3B  | ATG3      |
| LAML      | GABARAP  | ATG12     | GABARAPL2 | MAP1LC3B  | ATG3      | PRKAA2    | WWP1      | INS       | DNAJB1    | ATG16L2   |
| LGG       | PRKAA2   | ATG4B     | ATG3      | ULK1      | ATG12     | ATG4D     | GABARAPL1 | CASP8     | MAN2B1    | ATG16L2   |
| LIHC      | GABARAP  | MAP1LC3B  | GABARAPL2 | GABARAPL1 | ATG13     | BECN1     | PRKAA1    | ATG12     | HSP90AB1  | HSPA1A    |
| LUAD      | GABARAP  | MAP1LC3B  | ATG7      | GABARAPL2 | ATG12     | BECN1     | PRKAA1    | PRKAA2    | ULK1      | HSP90AB1  |
| LUSC      | ATG7     | GABARAP   | ATG12     | MAP1LC3B  | GABARAPL2 | ATG3      | PRKAA1    | GABARAPL1 | PIK3R4    | BECN1     |
| OV        | MAP1LC3B | BECN1     | GABARAPL2 | GABARAP   | ATG12     | GABARAPL1 | ATG3      | PRKAA1    | PRKAA2    | HSP90AB1  |
| PAAD      | GABARAP  | PIK3C3    | ATG7      | ATG5      | ATG12     | ATG4B     | MDM4      | ATG4A     | AGPS      | TSC2      |
| PRAD      | MAP1LC3B | GABARAPL2 | GABARAP   | GABARAPL1 | ATG5      | WWP1      | MDM4      | ATG16L2   | TSC2      | IFNG      |
| SARC      | MAP1LC3B | GABARAPL2 | ATG4B     | GABARAP   | ATG4A     | PRKAA2    | PRKAA1    | ATG4D     | HSP90AA1  | DNAJB1    |
| SKCM      | MAP1LC3B | GABARAP   | GABARAPL2 | ATG5      | ATG12     | PRKAA1    | HSPA1A    | HSP90AB1  | WWP1      | MDM4      |
| STAD      | GABARAP  | MAP1LC3B  | ATG12     | GABARAPL2 | ATG7      | PRKAA1    | BECN1     | HSP90AB1  | WWP1      | MDM4      |
| THCA      | UBE2L3   | ATG4B     | HSPA5     | ATG16L1   | ATG5      | BECN1     | ULK1      | ATG12     | GABARAPL1 | GABARAP   |
| UCEC      | MAP1LC3B | GABARAPL2 | GABARAP   | BECN1     | ATG12     | PRKAA1    | ATG3      | PRKAA2    | PIK3R4    | GABARAPL1 |

| ER Stress | Low      |          |        |          |          | High     |          |          |          |        |
|-----------|----------|----------|--------|----------|----------|----------|----------|----------|----------|--------|
|           | 1        | 2        | 3      | 4        | 5        | 1        | 2        | 3        | 4        | 5      |
| BLCA      | PARK2    | HSPA8    | STUB1  | HSPA5    | TP53     | HSPA6    | P4HB     | NPLOC4   | DNAJB11  | NSFL1C |
| BRCA      | HSPA8    | FBXO6    | TP53   | PARK2    | HSP90AA1 | STUB1    | HSPA6    | YOD1     | NPLOC4   | HSPA1A |
| CECSC     | HSPA8    | PARK2    | TP53   | CRYAB    | MAPK8    | DNAJB11  | HSPA6    | SEC61A1  | HSPA1A   | HSPA5  |
| COADREAD  | HSP90AA1 | TP53     | PARK2  | FBXO6    | LMAN1    | HSPH1    | HSP90AB1 | UBE2D4   | STUB1    | HSPA1A |
| GBM       | HSP90AA1 | MAPK8    | PARK2  | HSPA8    | STUB1    | UBE2D4   | DNAJB1   | SMURF1   | OS9      | SEC61G |
| HNCS      | HSPA8    | CRYAB    | MAPK9  | MAPK8    | FBXO6    | HSPA5    | HSP90AA1 | DNAJB11  | SEC61A1  | HSPA6  |
| KIRC      | HSP90AA1 | HSPA5    | PARK2  | FBXO6    | HSPA1A   | MAPK9    | SEC24A   | STUB1    | UBE2D4   | UBE2D2 |
| KIRP      | HSP90AA1 | HSPA8    | PARK2  | UBE4B    | MAP2K7   | STUB1    | TP53     | P4HB     | NPLOC4   | AMFR   |
| LAML      | TP53     | SEC24A   | UBQLN1 | STUB1    | UBE2D4   | HSPA8    | FBXO6    | CRYAB    | HSP90AA1 | HYOU1  |
| LGG       | HSP90AA1 | FBXO6    | PARK2  | UBE4B    | HSPA2    | HSPA8    | DNAJB1   | UBE2D4   | SMURF1   | PRKCSH |
| LIHC      | HSP90AA1 | PARK2    | TP53   | HSPA8    | FBXO6    | HSPA1A   | HSPA6    | HSP90AB1 | NPLOC4   | YOD1   |
| LUAD      | PARK2    | HSPA5    | TP53   | UBQLN1   | MAP2K7   | HSPA6    | HSPA1A   | NPLOC4   | HSP90AB1 | P4HB   |
| LUSC      | FBXO6    | TP53     | HSPA8  | STUB1    | MAPK9    | DNAJB11  | HSPA6    | SEC61A1  | NPLOC4   | ERLEC1 |
| OV        | PARK2    | HSPA5    | STUB1  | TP53     | HSP90AA1 | HSPA1A   | HSPA6    | DNAJB11  | DNAJB1   | NSFL1C |
| PAAD      | PARK2    | HSPA5    | TP53   | HSPA1A   | FBXO6    | HSPA6    | UBE2D4   | RFWD2    | YOD1     | SEC23A |
| PRAD      | TP53     | PARK2    | UBE2J1 | FBXO6    | HSP90AA1 | HSPA5    | SEC61A1  | UBE2D4   | SMURF1   | UBQLN1 |
| SARC      | HSPA8    | TP53     | MAPK8  | CRYAB    | HSPH1    | HSPA5    | UBQLN1   | MAP2K7   | DNAJB1   | HSPA6  |
| SKCM      | HSPA8    | PARK2    | HSPA5  | HSP90AA1 | MAPK8    | HSPA1A   | HSP90AB1 | HSPA6    | HSPA1L   | NPLOC4 |
| STAD      | PARK2    | HSP90AA1 | TP53   | STUB1    | MAP2K7   | HSP90AB1 | HSPA6    | HSPA5    | UBE2D4   | HSPH1  |
| THCA      | HSPA5    | ATF4     | PARK2  | UBQLN1   | UBE2L3   | HSP90AA1 | STUB1    | NPLOC4   | HSPA6    | P4HB   |
| UCEC      | HSPA5    | HSPA8    | TP53   | AMFR     | UBQLN1   | HSPA6    | HSPA1A   | HSP90AB1 | HSP90AA1 | DNAJB1 |

| Lysosome | Low   |       |       |        |          | High    |          |         |          |         |
|----------|-------|-------|-------|--------|----------|---------|----------|---------|----------|---------|
|          | 1     | 2     | 3     | 4      | 5        | 1       | 2        | 3       | 4        | 5       |
| BLCA     | CTSD  | PSAP  | TP53  | AP3M1  | GGA1     | CLTC    | GGA3     | AP1S1   | ATR      | SEC61A1 |
| BRCA     | FBXO6 | AP1G1 | AP1B1 | GGA1   | TP53     | GGA2    | CLTC     | GGA3    | CLN3     | CTSE    |
| CECSC    | CTSD  | TP53  | PSAP  | HSPA8  | CLTA     | DNAJB11 | GGA3     | CLTC    | ATR      | SEC61A1 |
| COADREAD | FBXO6 | GGA1  | TP53  | AP4E1  | SORT1    | CTSA    | AP1S1    | NEU1    | AP1G1    | GGA2    |
| GBM      | GGA1  | AP3M1 | PSAP  | CTSD   | AP3S2    | AP1S1   | ATP6V0A4 | GUSB    | AP1G1    | CTSA    |
| HNCS     | CTSD  | FBXO6 | AP3M1 | ATG7   | PSAP     | CLTC    | DNAJB11  | AP1B1   | ATR      | AP1S1   |
| KIRC     | FBXO6 | ATG7  | GLB1  | NPC2   | NEU1     | GGA2    | CLTC     | AP1G1   | AP1S1    | CLTB    |
| KIRP     | AP4E1 | AP4S1 | GBA   | LGMN   | AP4B1    | CLTC    | GGA3     | GGA2    | AP1G1    | CLN3    |
| LAML     | AP1S1 | AP1G1 | TP53  | CLTC   | ATP6V0A4 | GGA1    | FBXO6    | AP3M2   | ATP6V0D2 | CTSB    |
| LGG      | FBXO6 | CTSD  | SORT1 | PPT1   | PSAP     | AP1S1   | AP1G1    | CLTC    | ATP6V0A4 | AP1M2   |
| LIHC     | FBXO6 | TP53  | CLTA  | AP1G1  | CTSB     | CLTC    | GGA3     | CTSE    | NEU1     | CTSA    |
| LUAD     | GGA1  | TP53  | CLTA  | MAN2B1 | AP3M1    | CLTC    | GGA3     | GGA2    | CTSE     | CTSA    |
| LUSC     | FBXO6 | CTSD  | TP53  | PSAP   | AP3M1    | CLTC    | AP1B1    | GGA3    | GGA1     | M6PR    |
| OV       | GGA1  | CLTC  | AP1G1 | CTSD   | GGA2     | DNAJB11 | CTSA     | SEC61A1 | NEU1     | ATR     |

|      |       |       |       |       |       |          |         |          |          |         |
|------|-------|-------|-------|-------|-------|----------|---------|----------|----------|---------|
| PAAD | FBXO6 | GGA1  | CLTC  | GGA3  | TP53  | AP1S1    | CTSE    | ATP6V0D2 | CTSA     | SEC61A1 |
| PRAD | FBXO6 | AP1G1 | CLTC  | TP53  | AP1B1 | ATP6V0D2 | ATP6V1H | SEC61A1  | ATP6V0A4 | UBQLN1  |
| SARC | CTSD  | PSAP  | AP1G1 | TP53  | CLTA  | GGA3     | FBXO6   | CLTC     | MAN2B1   | GBA     |
| SKCM | PSAP  | CLTA  | AP3M1 | CTSD  | TP53  | CLTC     | GGA1    | GGA3     | AP1S1    | CTSA    |
| STAD | GGA1  | TP53  | GGA2  | AP4E1 | AP1B1 | CTSA     | NEU1    | AP1S1    | ATP6V0D2 | SEC61A1 |
| THCA | GGA1  | AP1B1 | IGF2R | ATM   | SORT1 | CLTC     | GGA3    | GGA2     | CLN3     | MDM2    |
| UCEC | AP1G1 | GGA1  | TP53  | CTSD  | AP4E1 | CTSA     | GGA3    | DNAJB11  | CTSE     | NEU1    |

| Proteasome | Low    |        |        |          |          | High   |        |        |         |        |
|------------|--------|--------|--------|----------|----------|--------|--------|--------|---------|--------|
|            | 1      | 2      | 3      | 4        | 5        | 1      | 2      | 3      | 4       | 5      |
| BLCA       | UBE2D2 | PARK2  | UBE2D3 | UBE2D1   | TRAF6    | SKP2   | UBR5   | UBE2W  | ANAPC11 | TCEB1  |
| BRCA       | TP53   | UBE2L3 | PARK2  | UBE2D3   | WWP2     | STUB1  | UBE2I  | RFWD2  | UBE2W   | UBR5   |
| CESC       | UBE2D3 | PARK2  | UBE2K  | UBE2D1   | TRAF6    | RFWD2  | SKP2   | UBE2W  | UBR5    | UBE2C  |
| COADREAD   | UBE2D3 | TP53   | NEDD4L | UBE2L3   | UBE3A    | UBE2W  | UBE2D4 | UBE2C  | UBR5    | BIRC7  |
| GBM        | UBE2D1 | PTEN   | PARK2  | UBE2L3   | HUWE1    | SMURF1 | UBE2D4 | FZR1   | UBE2H   | UBE2C  |
| HNSC       | UBE2D2 | UBE2D3 | UBE2E1 | UBE2D1   | UBA1     | UBR5   | UBE2W  | SKP2   | TCEB1   | UBE2L3 |
| KIRC       | UBE2E1 | PARK2  | VHL    | UBE2E2   | HSP90AA1 | UBE2D2 | SKP1   | UBE2B  | MDM2    | FBXW11 |
| KIRP       | UBE2L3 | UBE4B  | NEDD4L | HSP90AA1 | SFN      | BRCA1  | STUB1  | MDM2   | UBE2I   | TP53   |
| LAML       | UBE2D2 | SKP1   | UBE2B  | TP53     | SMURF1   | UBE2W  | UBR5   | UBE2L3 | DBB1    | BIRC2  |
| LGG        | UBE2D1 | UBE2D3 | PARK2  | UBA1     | MDM2     | SMURF1 | FZR1   | UBE2H  | UBR5    | UBE2D4 |
| LIHC       | UBE2D3 | TP53   | PARK2  | HUWE1    | UBE2G1   | RFWD2  | UBE2D2 | UBR5   | UBE2W   | SKP2   |
| LUAD       | PARK2  | FZR1   | TP53   | UBE2D2   | UBE2D3   | SKP2   | RFWD2  | UBE2W  | UBR5    | BRCA1  |
| LUSC       | UBE2D2 | UBE2D3 | UBE2D1 | SKP1     | MAP3K1   | SKP2   | UBE2L3 | UBE2W  | UBR5    | SMURF1 |
| OV         | UBE2D3 | FZR1   | BRCA1  | PARK2    | UBE2L3   | UBR5   | RFWD2  | SKP2   | UBE2W   | UBE2H  |
| PAAD       | PARK2  | TP53   | NEDD4L | UBE2L3   | HUWE1    | RFWD2  | UBE2W  | UBR5   | UBE2D4  | SMURF1 |
| PRAD       | TP53   | PTEN   | PARK2  | UBE2L3   | BRCA1    | UBE2W  | UBR5   | TCEB1  | UBE2D4  | SMURF1 |
| SARC       | UBE2D1 | TP53   | XIAP   | TRAF6    | PTEN     | MDM2   | SKP2   | UBE2D2 | UBA1    | FZR1   |
| SKCM       | UBE2D1 | PARK2  | UBE2D2 | UBE2D3   | PTEN     | UBE2L3 | RFWD2  | UBE2W  | SMURF1  | UBE2H  |
| STAD       | UBE2D3 | UBE2D2 | PARK2  | TP53     | UBE2L3   | UBE2W  | UBR5   | UBE2D4 | UBE2C   | SMURF1 |
| THCA       | UBE2L3 | CHEK2  | UBE2D1 | ANAPC2   | PARK2    | UBE2D2 | SKP1   | RFWD2  | STUB1   | BRCA1  |
| UCEC       | UBE2D3 | FZR1   | TP53   | UBE2D2   | NEDD4    | RFWD2  | UBE2D1 | UBE2W  | UBR5    | UBA1   |

| Peroxisome | Low     |          |         |       |         | High  |         |        |        |         |
|------------|---------|----------|---------|-------|---------|-------|---------|--------|--------|---------|
|            | 1       | 2        | 3       | 4     | 5       | 1     | 2       | 3      | 4      | 5       |
| BLCA       | HSD17B4 | ACSL4    | CAT     | TP53  | SLC27A2 | PEX19 | PEX5    | PEX12  | PEX13  | PEX10   |
| BRCA       | PEX14   | SLC27A2  | AGPS    | TP53  | HSD17B4 | PEX19 | PEX5    | PEX11B | PEX2   | ABCD2   |
| CESC       | HSD17B4 | ACSL4    | PEX7    | SOD1  | TP53    | PEX19 | PEX14   | ABCD3  | PEX5   | PEX10   |
| COADREAD   | PEX14   | HSD17B4  | PRDX1   | SOD1  | ABCD3   | PEX5  | PEX19   | PEX1   | NOS2   | PEX2    |
| GBM        | PEX7    | ABCD1    | PHYH    | PEX14 | PEX3    | PEX19 | PEX5    | PEX1   | GSTK1  | PEX6    |
| HNSC       | HSD17B4 | ACAA1    | SOD1    | SCP2  | ACOX2   | PEX5  | PEX19   | PEX2   | ABCD1  | PEX13   |
| KIRC       | PEX14   | PEX3     | ACAA1   | PEX7  | DHRS4   | PEX5  | HSD17B4 | CAT    | PEX19  | AGPS    |
| KIRP       | PEX14   | PEX3     | SOD1    | PRDX1 | ABCD3   | PEX5  | NOS2    | PEX12  | ABCD1  | AGPS    |
| LAML       | PEX5    | HSD17B4  | PEX1    | GSTK1 | CAT     | PEX2  | PEX19   | SOD1   | PEX14  | PEX10   |
| LGG        | PEX14   | ABCD3    | PEX10   | PRDX1 | SCP2    | PEX5  | PEX1    | GSTK1  | CROT   | PEX6    |
| LIHC       | PEX5    | PEX14    | SOD1    | PEX7  | PRDX1   | PEX19 | PEX11B  | PEX26  | PEX6   | PEX1    |
| LUAD       | HSD17B4 | PEX7     | SLC27A2 | ACAA1 | SOD1    | PEX19 | PEX5    | PEX12  | PEX10  | PEX11B  |
| LUSC       | HSD17B4 | PEX14    | ACAA1   | SOD1  | SCP2    | PEX5  | PEX19   | PEX13  | AGPS   | EHHADH  |
| OV         | NOS2    | PEX12    | HSD17B4 | PEX3  | TP53    | PEX5  | PEX19   | AGPS   | PEX13  | PEX11B  |
| PAAD       | PEX14   | PEX7     | SOD1    | PEX3  | PRDX1   | PEX19 | PEX5    | PEX11B | PEX2   | ABCD2   |
| PRAD       | PEX5    | PEX14    | AGPS    | ABCD3 | HSD17B4 | PEX2  | PEX1    | PEX6   | CYCS   | PEX5L   |
| SARC       | PEX5    | AGPS     | ABCD1   | ACSL4 | TP53    | PEX19 | PEX14   | PEX11B | PEX3   | PRDX1   |
| SKCM       | PEX7    | PEX3     | HSD17B4 | PHYH  | SOD1    | PEX19 | PEX11B  | PEX1   | PEX6   | PEX26   |
| STAD       | HSD17B4 | SOD1     | SCP2    | ACAA1 | PRDX1   | PEX19 | PEX5    | PEX2   | PEX13  | PEX1    |
| THCA       | PEX26   | SLC25A17 | AGPS    | SOD1  | PEX6    | PEX5  | PEX19   | PEX12  | NOS2   | HSD17B4 |
| UCEC       | HSD17B4 | SLC27A2  | TP53    | NUDT7 | NUDT12  | PEX19 | PEX5    | PEX13  | PEX11B | ABCD3   |

Blue= Significant allelic loss in this pathway in this cancer type

Red= Significant allelic gain in this pathway in this cancer type

Numbers indicate rank of most impactful gene, from 1 being most impactful to 5 being the 5th most impactful

### Supplementary Table 2: The most positively and negatively impactful genes within HAPTRIG proteostasis networks

Genes were (scored with 1° interactions with other proteostasis pathways).

Pathways with significantly altered networks within a given cancer type are highlighted.

### GISTIC2 Copy Number Alterations: Autophagy Genes

| Cell Line | p53 mut     | KRAS mut | BECN1  | MAP1LC3B | ATG5   | PIK3C3 | GABARAPL2 | ULK2   | GABARAP | ATG10 | ATG12 | ATG13  | ATG7   | INS   | ATG16L2 |
|-----------|-------------|----------|--------|----------|--------|--------|-----------|--------|---------|-------|-------|--------|--------|-------|---------|
| OVCAR3    | R248Q       | -        | -1     | -1       | 0      | -1     | -1        | 1      | -2      | 0     | 0     | 1      | 0      | 0     | 2       |
| OVCAR5    | -           | G12V     | 1      | 1        | -1     | 1      | -1        | 0      | -1      | 0     | 1     | -1     | -1     | -1    | 1       |
| OVCAR8    | X126_splice | P121H    | 1      | 1        | -1     | 0      | 0         | -1     | -1      | 1     | 1     | -1     | 1      | -1    | 1       |
| SKOV3     | -           | -        | 2      | 0        | 0      | 0      | 0         | -1     | -1      | 0     | 0     | 0      | 0      | -1    | 0       |
| IGROV1    | Y126C       | -        | 0      | 0        | 0      | -1     | 0         | 0      | 0       | 0     | 0     | -1     | -1     | 0     | 0       |
| A2780     | -           | -        | 0      | 0        | 0      | 0      | -1        | 0      | 0       | 0     | 0     | 0      | 0      | 0     | 0       |
|           | GABARAPL1   | IFNG     | ULK1   | ATG14    | ULK3   | ATG4D  | ATG4C     | PRKAA2 | ATG16L1 | ATG4B | ATG3  | PIK3R4 | PRKAA1 | ATG4A |         |
| OVCAR3    | -1          | 0        | 0      | 1        | -1     | 0      | 0         | 0      | 0       | -1    | 2     | 2      | 1      | 0     |         |
| OVCAR5    | -1          | 1        | -1     | -1       | 1      | 1      | 0         | 0      | 0       | -1    | -1    | 1      | 0      | -1    |         |
| OVCAR8    | 0           | 0        | 1      | 1        | 0      | 1      | 1         | 1      | 0       | 0     | 1     | 1      | 1      | 0     |         |
| SKOV3     | -2          | 0        | 0      | 0        | 0      | 0      | 0         | 0      | 0       | 0     | 0     | 0      | 0      | 0     |         |
| IGROV1    | 0           | 0        | 0      | 0        | 0      | 0      | 0         | 0      | 0       | 0     | -1    | 0      | 0      | -1    |         |
| A2780     | 0           | 0        | 0      | 0        | 0      | 0      | 0         | 0      | 0       | 0     | 0     | 0      | 0      | 0     |         |
|           | IFNA1       | IFNA10   | IFNA13 | IFNA14   | IFNA16 | IFNA17 | IFNA2     | IFNA21 | IFNA4   | IFNA5 | IFNA6 | IFNA7  | IFNA8  |       |         |
| OVCAR3    | 1           | 1        | 1      | 1        | 1      | 1      | 1         | 1      | 1       | 1     | 1     | 1      | 1      |       |         |
| OVCAR5    | -1          | -1       | -1     | -1       | -1     | -1     | -1        | -1     | -1      | -1    | -1    | -1     | -1     |       |         |
| OVCAR8    | 0           | 0        | 0      | 0        | 0      | 0      | 0         | 0      | 0       | 0     | 0     | 0      | 0      |       |         |
| SKOV3     | -1          | -1       | -1     | -1       | -1     | -1     | -1        | -1     | -1      | -1    | -1    | -1     | -1     |       |         |
| IGROV1    | 0           | 0        | 0      | 0        | 0      | 0      | 0         | 0      | 0       | 0     | 0     | 0      | 0      |       |         |
| A2780     | 0           | 0        | 0      | 0        | 0      | 0      | 0         | 0      | 0       | 0     | 0     | 0      | 0      |       |         |

Unknown Genetics: U373, LPPDOV, OVCAR10

#### Supplementary Table 3: Autophagy gene status of cell lines studied

Gain/loss scores from the Cancer Cell Line Encyclopedia as curated by the cBioPortal were used to determine copy number aberrations. KRAS and TP53 mutations are also shown.



| Year            | Study PMID | Study Title                                                                                                                                    | Pathway Finding                       | Gene Findings (+ Regulation)                                            | Gene Findings (- Regulation)                                 | Gene Findings (Mutation)                                 | In Vitro test | In Vivo Test |
|-----------------|------------|------------------------------------------------------------------------------------------------------------------------------------------------|---------------------------------------|-------------------------------------------------------------------------|--------------------------------------------------------------|----------------------------------------------------------|---------------|--------------|
| (Current study) |            | Haploinsufficiency Networks Identify Targetable Patterns of Allelic Deficiency in Low Mutation Ovarian Cancer                                  | Autophagy                             | CTSD, PEX5, PCAT1/2, many more                                          | MAP1LC3B, BECN1                                              | N/A                                                      | 10+ models    | 3 models     |
| 2016            | 27372738   | Integrated Proteogenomic Characterization of Human High-Grade Serous Ovarian Cancer                                                            | HR, JAK/STAT, SRF, PDGFRb             | N/A                                                                     | N/A                                                          | N/A                                                      | N/A           | N/A          |
| 2015            | 25888305   | A network model for angiogenesis in ovarian cancer                                                                                             | Angiogenesis                          | NFKB1, ARID3A, SOX5, TFAP2A, NKX2-5, PRRX2                              | AHR, SPIB, MZF1, BRCA1                                       | N/A                                                      | N/A           | N/A          |
| 2015            | 25710373   | Spatial and Temporal Heterogeneity in High-Grade Serous Ovarian Cancer: A Phylogenetic Analysis                                                | Clonal expansions                     | 2q, 3p, Chr10                                                           | NF1                                                          | TP53, BRCA1/2, NF1, APC                                  | N/A           | N/A          |
| 2015            | 26017449   | Whole-genome characterization of chemoresistant ovarian cancer                                                                                 | BRCA, MDR                             | CCNE1, MDR1, ABCB1                                                      | RB1, NF1, RAD51B, PTEN                                       | BRCA1, BRCA2                                             | N/A           | N/A          |
| 2015            | 25581432   | Gene expression analysis identifies global gene dosage sensitivity in cancer                                                                   | DNA stability                         | MYC, CCNE1, PIK3CA, BIRC5                                               | TP53, CDKN2A, RB1, BRCA1, BRCA2, ATM                         | N/A                                                      | N/A           | N/A          |
| 2014            | 24448499   | Integrated analysis of germline and somatic variants in ovarian cancer                                                                         | Fanconi Anemia, MAPK, MLL, DNA repair | N/A                                                                     | BRCA, FANC, ATR, others                                      | NF1, KRAS, others                                        | N/A           | N/A          |
| 2014            | 24071852   | Pan-cancer patterns of somatic copy number alteration                                                                                          | Whole-genome-duplication              | CCND1, EGFR, MYC, ERBB2, CCNE1, MCL1, MDM2, WHSC1L1, TERC, TERT, RMRP   | ATM, NOTCH, PPP2RA, PTTG11P, FOXK2, LINC00290, ERFF11, FOXC1 | N/A                                                      | N/A           | N/A          |
| 2013            | 24071851   | Emerging landscape of oncogenic signatures across human cancers                                                                                | Cell cycle, BRCA                      | MYC, CCNE1                                                              | TP53, BRCA                                                   | TP53, others                                             | N/A           | N/A          |
| 2013            | 23822816   | Large-scale integrative network-based analysis identifies common pathways disrupted by copy number alterations across cancers                  | TGFb, MAPK, MYC                       | MYC, TRIB1, E2F3, AURKA                                                 | NCOR1, PPP2RA, CLU, MAP2K4                                   | N/A                                                      | N/A           | N/A          |
| 2011            | 21720365   | Integrated genomic analyses of ovarian carcinoma                                                                                               | RB, RAS, HR, NOTCH, FOXM1             | MYC, CXCL10/11, CXCR3, HMGA2, SOX11, MCM2, PCNA, MUC16, MUC1, SLPI, HOX | MUC1, MUC16                                                  | TP53, NF1, BRCA1, BRCA2, RB1, CDK12, CSMD3, FAT3, GABRA6 | N/A           | N/A          |
| 2009            | 19193619   | Integrated genome-wide DNA copy number and expression analysis identifies distinct mechanisms of primary chemoresistance in ovarian carcinomas | Cell cycle, ECM deposition            | CCNE1, ERBB2, MUC1, MYC                                                 | BRCA1, IGF2R                                                 | N/A                                                      | N/A           | N/A          |

**Supplementary Table 4: Notable pathway analyses performed for OV.**
